# Supplementary material for: Heavy Metal Bioaccumulation in Peruvian Food and Medicinal Products
Source: MDPI journal article supplement (doi:10.3390/foods13050762), 2024-02-29
Supplement: s1 [file s1]

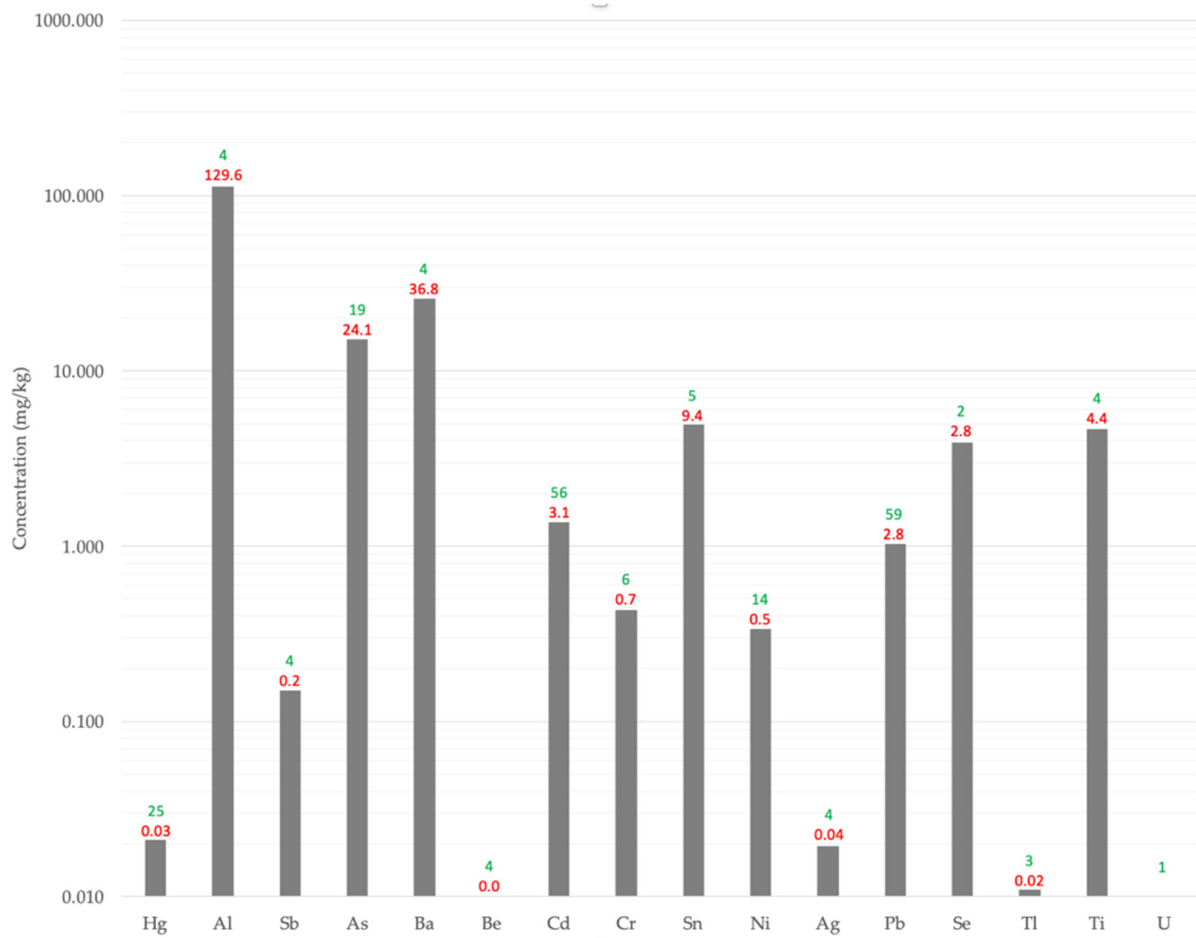

**Figure S4.** Mean of each metal documented in Peruvian macroinvertebrates and mollusks. Green numbers indicate the quantity of analyses that considered a given metal. WHO standards aren't displayed because they are specific to the food/medicinal type.
