# Supplementary material for: Heavy Metal Bioaccumulation in Peruvian Food and Medicinal Products
Source: MDPI journal article supplement (doi:10.3390/foods13050762), 2024-02-29
Supplement: s1 [file s1]

**Table S3.** Number of publications from each research institution considered in this review, for each food/medicinal category. Unlisted institutions did not have any publications.

| Research institution                                          | Plants | Fish | Macroinvertebrates and mollusks | Mammals | Others | Sum |
|---------------------------------------------------------------|--------|------|---------------------------------|---------|--------|-----|
| Universidad Nacional de Trujillo                              | 16     | 2    | 1                               |         | 5      | 24  |
| Universidad Nacional Mayor de San Marcos                      | 13     | 3    |                                 | 2       | 2      | 20  |
| Universidad Nacional del Centro del Perú                      | 14     | 1    |                                 | 2       |        | 17  |
| Universidad Nacional de la Amazonía Peruana                   | 7      | 2    |                                 | 6       |        | 15  |
| Universidad Nacional Agraria de la Selva                      | 11     | 2    |                                 |         |        | 13  |
| Universidad Nacional de San Agustín de Arequipa               | 5      | 3    | 4                               |         |        | 12  |
| Universidad Nacional de Ucayali                               | 9      | 2    |                                 |         |        | 11  |
| Universidad Nacional Daniel Alcides Carrión                   | 7      | 1    |                                 |         | 1      | 9   |
| Universidad Nacional Agraria La Molina                        | 5      |      | 2                               |         | 1      | 8   |
| Universidad Nacional Hermilio Valdizán de Huánuco             | 4      | 1    |                                 |         | 1      | 6   |
| Universidad Nacional del Altiplano                            | 4      | 1    |                                 |         |        | 5   |
| Universidad Nacional de Piura                                 | 5      |      |                                 |         |        | 5   |
| Universidad Nacional Toribio Rodríguez de Mendoza de Amazonas | 5      |      |                                 |         |        | 5   |
| Universidad Nacional de Moquegua                              |        | 1    | 1                               | 1       | 2      | 5   |
| Universidad Nacional Jorge Basadre Grohmann                   | 1      | 2    | 1                               |         |        | 4   |
| Universidad Nacional de Huancavelica                          | 2      | 2    |                                 |         |        | 4   |
| Universidad Nacional de San Cristóbal de Huamanga             | 2      | 1    |                                 |         |        | 3   |
| Universidad Nacional de San Antonio Abad del Cusco            | 2      | 1    |                                 |         |        | 3   |
| Universidad Nacional de San Martín                            | 3      |      |                                 |         |        | 3   |
| Universidad Nacional de Juliaca                               | 3      |      |                                 |         |        | 3   |

|                                                                        |   |   |   |   |
|------------------------------------------------------------------------|---|---|---|---|
| Universidad Nacional de Jaén                                           | 3 |   |   | 3 |
| Universidad Nacional San Luis Gonzaga                                  | 2 |   |   | 2 |
| Universidad Nacional de Cajamarca                                      | 1 |   | 1 | 2 |
| Universidad Nacional Federico Villarreal                               | 2 |   |   | 2 |
| Universidad Nacional Santiago Antúnez de Mayolo                        | 1 | 1 |   | 2 |
| Universidad Nacional del Santa                                         |   | 1 | 1 | 2 |
| Universidad Nacional Micaela Bastidas de Apurímac                      | 1 |   | 1 | 2 |
| Revista Chemical Data Collections                                      | 2 |   |   | 2 |
| Revista de Investigaciones Veterinarias del Perú                       | 2 |   |   | 2 |
| Universidad Nacional de Ingeniería                                     | 1 |   |   | 1 |
| Universidad Nacional del Callao                                        | 1 |   |   | 1 |
| Universidad Nacional Amazónica de Madre de Dios                        | 1 |   |   | 1 |
| Revista Scientia Agropecuaria                                          | 1 |   |   | 1 |
| Revista Science of The Total Environment                               | 1 |   |   | 1 |
| Revista Forestal del Perú de la Universidad Nacional Agraria La Molina | 1 |   |   | 1 |
| Revista Chemosphere                                                    | 1 |   |   | 1 |
| Revista Avances en Ciencias e Ingeniería                               | 1 |   |   | 1 |
| Organismo de Evaluación y Fiscalización Ambiental                      | 1 |   |   | 1 |
| Salud y Tecnología Veterinaria                                         | 1 |   |   | 1 |
| Revista Peruana de Biología de la UNMSM                                | 1 |   |   | 1 |
| Revista Perú Biol de Universidad Nacional Mayor de San Marcos          |   | 1 |   | 1 |
| Revista de Investigación Científica REBIOL                             | 1 |   |   | 1 |
| Revista de Investigación Científica de Universidad Nacional de Juliaca |   | 1 |   | 1 |

|                                                                 |   |   |   |
|-----------------------------------------------------------------|---|---|---|
| Revista Ciencia y Desarrollo de la<br>Universidad Alas Peruanas | 1 |   | 1 |
| Ministerio del Ambiente                                         | 1 |   | 1 |
| Instituto Tecnológico de la<br>Producción                       |   | 1 | 1 |
| Instituto Tecnológico Pesquero del<br>Perú                      | 1 |   | 1 |
| Instituto del Mar del Perú                                      |   | 1 | 1 |

---
