# Supplementary material for: Heavy Metal Bioaccumulation in Peruvian Food and Medicinal Products
Source: MDPI journal article supplement (doi:10.3390/foods13050762), 2024-02-29
Supplement: s1 [file s1]

**Table S1.** Scientific literature published in English journals (up to 2022).

| Decade | Title                                                                                                                                                                                                                        | Source                       |
|--------|------------------------------------------------------------------------------------------------------------------------------------------------------------------------------------------------------------------------------|------------------------------|
| 1997   | Arsenic and heavy metal contamination of soil and vegetation around a copper mine in Northern Peru                                                                                                                           | Bech et al. [164]            |
| 2002   | Heavy metal concentrations in fish from a pristine rainforest valley in Peru: a baseline study before the start of oil drilling activities                                                                                   | Gitleb et al. [8]            |
| 2012   | Shoot accumulation of several trace elements in native plant species from contaminated soils in the Peruvian Andes                                                                                                           | Bech et al. [165]            |
| 2012   | Elevated mercury concentrations in humans of Madre de Dios, Peru                                                                                                                                                             | Ashe [166]                   |
| 2012   | A phytoremediation approach using <i>Calamagrostis ligulata</i> and <i>Juncus imbricatus</i> in Andean wetlands of Peru                                                                                                      | Alvarez et al. [167]         |
| 2014   | Metal leaching, acidity, and altitude confine benthic macroinvertebrate community composition in Andean streams                                                                                                              | Loayza-Muro et al. [168]     |
| 2015   | Tissue-specific Cd and Pb accumulation in Peruvian scallop ( <i>Argopecten purpuratus</i> ) transplanted to a suspended and bottom culture at Sechura Bay, Peru                                                              | Loaiza et al. [169]          |
| 2015   | Mercury Contamination in an Indicator Fish Species from Andean Amazonian Rivers Affected by Petroleum Extraction                                                                                                             | Webb et al. [170]            |
| 2017   | Mercury Levels in Human Hair and Farmed Fish near Artisanal and Small-Scale Gold Mining Communities in the Madre de Dios River Basin, Peru                                                                                   | Langeland et al. [24]        |
| 2017   | Bioaccumulation of heavy metals in <i>Oncorhynchus mykiss</i> for export at production centers in the Peruvian Central Highlands                                                                                             | Zapata et al. [7]            |
| 2017   | Mercury concentrations in bats (Chiroptera) from a gold mining area in the Peruvian Amazon                                                                                                                                   | Moreno-Brush et al. [171]    |
| 2018   | Assessment of polychlorinated biphenyls, organochlorine pesticides, and polybrominated diphenyl ethers in the blood of Humboldt Penguins ( <i>Spheniscus humboldti</i> ) from the Punta San Juan Marine Protected Area, Peru | Adkesson et al. [172]        |
| 2018   | Presence of artisanal gold mining predicts mercury bioaccumulation in five genera of bats (Chiroptera)                                                                                                                       | Kumar et al. [173]           |
| 2018   | Mercury Contamination in Riverine Sediments and Fish Associated with Artisanal and Small-Scale Gold Mining in Madre de Dios, Peru                                                                                            | Martinez et al. [174]        |
| 2018   | Potential health risks via consumption of six edible shellfish species collected from Piura – Peru                                                                                                                           | Loaiza et al. [175]          |
| 2018   | Accumulation of heavy metals in native Andean plants: potential tools for soil phytoremediation in Ancash (Peru)                                                                                                             | Chang-Kee et al. [140]       |
| 2019   | Potentially toxic metals in lotic systems with aptitude for aquaculture at the watershed Mantaro River, Peru                                                                                                                 | Custodio et al. [176]        |
| 2019   | Impact of Heavy Metals on Community Farming Activities in the Central Peruvian Andes                                                                                                                                         | Quispe-Zuniga et al. [177]   |
| 2019   | Quantitative Determination of Cadmium (Cd) in Soil-Plant System in Potato Cropping ( <i>Solanum tuberosum</i> var. Huayro)                                                                                                   | Oliva et al. [178]           |
| 2019   | Cd and Pb reduction in cocoa ( <i>Theobroma cacao</i> ) nib using two organic amendments                                                                                                                                     | Dávila-Zamora et al. [179]   |
| 2019   | Predictors of mitochondrial DNA copy number and damage in a mercury-exposed rural Peruvian population near artisanal and small-scale gold mining: An exploratory study                                                       | Berky et al. [180]           |
| 2019   | Efecto del cadmio sobre la mortalidad de adultos de <i>Polydora</i> sp. (Polychaeta: Spionidae) en el laboratorio                                                                                                            | Herrera-Perez et al. [27]    |
| 2020   | Evaluating Wildlife Vulnerability to Mercury Pollution From Artisanal and Small-Scale Gold Mining in Madre de Dios, Peru                                                                                                     | Markham and Sangermano [181] |
| 2020   | Lead Bioaccumulation in Root and Aerial Part of Natural and Cultivated Pastures in Highly Contaminated Soils in Central Andes of Peru                                                                                        | Berdriñana et al. [182]      |

|      |                                                                                                                                                              |                                       |
|------|--------------------------------------------------------------------------------------------------------------------------------------------------------------|---------------------------------------|
| 2020 | Uptake and depletion of the antibiotic sulfadiazine .sup.14C in rainbow trout                                                                                | Vilca et al. [183]                    |
| 2020 | Monitoring the occurrence of microplastic ingestion in Otariids along the Peruvian and Chilean coasts                                                        | Perez-Venegas et al. [184]            |
| 2020 | Effect of urea on lead absorption in corn ( <i>Zea mays</i> L.), spinach ( <i>Spinacia oleracea</i> L.) and cabbage ( <i>Brassica oleracea</i> L.)           | Peñafiel-Sandoval and Iannacone [185] |
| 2020 | Soil, Site, and Management Factors Affecting Cadmium Concentrations in Cacao-Growing Soils                                                                   | Scaccabarozzi et al. [186]            |
| 2020 | Mercury bioaccumulation in tropical bats from a region of active artisanal and small-scale gold mining                                                       | Carrasco-Rueda et al. [187]           |
| 2020 | Cadmium Uptake in Native Cacao Trees in Agricultural Lands of Bagua, Peru                                                                                    | Oliva et al. [188]                    |
| 2020 | Study to Determine Levels of Cadmium in Cocoa Crops Applied to Inland Areas of Peru: "The Case of the Campo Verde-Honoria Tournavista Corridor"              | Rosales-Huamani et al. [60]           |
| 2020 | Elevated Hair Mercury Levels Are Associated With Neurodevelopmental Deficits in Children Living Near Artisanal and Small-Scale Gold Mining in Peru           | Reuben et al. [189]                   |
| 2020 | Mislabelling and high mercury content hampers the efforts of market-based seafood initiatives in Peru                                                        | Biffi et al. [26]                     |
| 2020 | Potentially toxic metals and metalloids in surface water intended for human consumption and other uses in the Mantaro River watershed, Peru                  | Custodio et al. [190]                 |
| 2020 | Citizen science campaign reveals widespread fallout of contaminated dust from mining activities in the central Peruvian Andes                                | Molloy et al. [30]                    |
| 2020 | Inexpensive Organic Materials and Their Applications towards Heavy Metal Attenuation in Waters from Southern Peru                                            | Garcia-Chevesich et al. [191]         |
| 2020 | Treatment of tannery wastewater in a pilot scale hybrid constructed wetland system in Arequipa, Peru                                                         | Zapana et al. [192]                   |
| 2021 | Lead transfer in the soil-root-plant system in a highly contaminated Andean area                                                                             | Castro-Bedriñana et al. [193]         |
| 2021 | Accumulation of As, Ag, Cd, Cu, Pb, and Zn by Native Plants Growing in Soils Contaminated by Mining Environmental Liabilities in the Peruvian Andes          | Cruzado-Tafur et al. [141]            |
| 2021 | Cadmium, Lead and Zinc in the Soil-Plant-Alpaca System and Potential Health Risk Assessment Associated with the Intake of Alpaca Meat in Huanacavelica, Peru | Orellana et al. [138]                 |
| 2021 | Bioconcentration and bioaccumulation of toxic metals in <i>Scirpus californicus</i> from natural wetlands in the Central Andes of Peru                       | Boleji et al. [194]                   |
| 2021 | A population-based mercury exposure assessment near an artisanal and small-scale gold mining site in the Peruvian Amazon                                     | Weinhouse et al. [25]                 |
| 2021 | Insights from Water Quality of High Andean Springs for Human Consumption in Peru                                                                             | Choque-Quispe et al. [195]            |
| 2021 | Human risk associated with the ingestion of artichokes grown in soils irrigated with water contaminated by potentially toxic elements, Junin, Peru           | Custodio et al. [196]                 |
| 2021 | Mercury Exposure and Toxicological Consequences in Fish and Fish-Eating Wildlife from Anthropogenic Activity in Latin America                                | Canham et al. [197]                   |
| 2022 | Lead and Cadmium Bioaccumulation in Fresh Cow's Milk in an Intermediate Area of the Central Andes of Peru and Risk to Human Health                           | Chirinos-Peinado et al. [4]           |
| 2022 | Mercury concentrations, biomagnification and isotopic discrimination factors in two seabird species from the Humboldt Current ecosystem                      | Le Croizier et al. [198]              |
| 2022 | Cadmium and lead levels in muscle tissue of blue shark ( <i>Prionace glauca</i> ) in the Southeastern Pacific Waters                                         | Cordero-Maldonado et al. [199]        |
| 2022 | Amazon forests capture high levels of atmospheric mercury pollution from artisanal gold mining                                                               | Gerson et al. [31]                    |

---
