# Supplementary material for: Heavy Metal Bioaccumulation in Peruvian Food and Medicinal Products
Source: MDPI journal article supplement (doi:10.3390/foods13050762), 2024-02-29
Supplement: s1 [file s1]

**Table S2.** Maximum permissible limits (MPLs) of different food/medicinal types, under the World Health Organization's (Codex Alimentarius) standards (CH<sub>3</sub>Hg = methyl mercury).

| Food type                                                                                       | Hg | CH <sub>3</sub> -Hg | Al | Sb | As  | Ba | Be | Cd   | Cr | Sn  | Ni | Ag | Pb   | Se | Tl | Ti | U |
|-------------------------------------------------------------------------------------------------|----|---------------------|----|----|-----|----|----|------|----|-----|----|----|------|----|----|----|---|
| Berries and other small fruits                                                                  |    |                     |    |    |     |    |    |      |    |     |    |    | 0.10 |    |    |    |   |
| Canned beverages                                                                                |    |                     |    |    |     |    |    |      |    | 150 |    |    |      |    |    |    |   |
| Canned chestnuts and Canned chestnuts puree                                                     |    |                     |    |    |     |    |    |      |    |     |    |    | 0.05 |    |    |    |   |
| Canned foods (other than beverages)                                                             |    |                     |    |    |     |    |    |      |    | 250 |    |    |      |    |    |    |   |
| Cephalopods                                                                                     |    |                     |    |    |     |    |    | 2.00 |    |     |    |    |      |    |    |    |   |
| Cereal grains                                                                                   |    |                     |    |    |     |    |    | 0.10 |    |     |    |    | 0.20 |    |    |    |   |
| Chocolate (>70% cacao)                                                                          |    |                     |    |    |     |    |    | 0.90 |    |     |    |    |      |    |    |    |   |
| Chocolate (50-70% cacao)                                                                        |    |                     |    |    |     |    |    | 0.80 |    |     |    |    |      |    |    |    |   |
| Corned beef                                                                                     |    |                     |    |    |     |    |    |      |    | 50  |    |    |      |    |    |    |   |
| Cranberry                                                                                       |    |                     |    |    |     |    |    |      |    |     |    |    | 0.20 |    |    |    |   |
| Cucumbers (pickled)                                                                             |    |                     |    |    |     |    |    |      |    |     |    |    | 0.10 |    |    |    |   |
| Currants                                                                                        |    |                     |    |    |     |    |    |      |    |     |    |    | 0.20 |    |    |    |   |
| Edible fats and oils                                                                            |    |                     |    |    | 0.1 |    |    |      |    |     |    |    | 0.1  |    |    |    |   |
| Edible offal of cattle                                                                          |    |                     |    |    |     |    |    |      |    |     |    |    | 0.20 |    |    |    |   |
| Edible offal of pig                                                                             |    |                     |    |    |     |    |    |      |    |     |    |    | 0.15 |    |    |    |   |
| Edible offal of poultry                                                                         |    |                     |    |    |     |    |    |      |    |     |    |    | 0.10 |    |    |    |   |
| Elderberry                                                                                      |    |                     |    |    |     |    |    |      |    |     |    |    | 0.20 |    |    |    |   |
| Fat spreads and blended spreads                                                                 |    |                     |    |    | 0.1 |    |    |      |    |     |    |    | 0    |    |    |    |   |
| Fish                                                                                            |    |                     |    |    |     |    |    |      |    |     |    |    | 0.30 |    |    |    |   |
| Fish (alfonsino)                                                                                |    | 1.50                |    |    |     |    |    |      |    |     |    |    | 0.30 |    |    |    |   |
| Fish (marlin)                                                                                   |    | 1.70                |    |    |     |    |    |      |    |     |    |    | 0.30 |    |    |    |   |
| Fish (shark)                                                                                    |    | 1.60                |    |    |     |    |    |      |    |     |    |    | 0.30 |    |    |    |   |
| Fish (tuna)                                                                                     |    | 1.20                |    |    |     |    |    |      |    |     |    |    | 0.30 |    |    |    |   |
| Fruits                                                                                          |    |                     |    |    |     |    |    |      |    |     |    |    | 0.10 |    |    |    |   |
| Fruits (canned)                                                                                 |    |                     |    |    |     |    |    |      |    |     |    |    | 0.10 |    |    |    |   |
| Ham (cooked cured)                                                                              |    |                     |    |    |     |    |    |      |    | 50  |    |    |      |    |    |    |   |
| Infant formula, formula for special medical purposes intended for infants and follow-up formula |    |                     |    |    |     |    |    |      |    |     |    |    | 0    |    |    |    |   |
| Jams, jellies, and marmalades                                                                   |    |                     |    |    |     |    |    |      |    |     |    |    | 0.4  |    |    |    |   |
| Juices (fruit, obtained exclusively from berries and other small fruits)                        |    |                     |    |    |     |    |    |      |    |     |    |    | 0.05 |    |    |    |   |
| Juices (fruit)                                                                                  |    |                     |    |    |     |    |    |      |    |     |    |    | 0.03 |    |    |    |   |
| Juices (grape)                                                                                  |    |                     |    |    |     |    |    |      |    |     |    |    | 0.04 |    |    |    |   |
| Mango chutney                                                                                   |    |                     |    |    |     |    |    |      |    |     |    |    | 0.4  |    |    |    |   |
| Marine bivalve mollusks without viscera (except oysters and scallops)                           |    |                     |    |    |     |    |    | 2.00 |    |     |    |    |      |    |    |    |   |
| Mushrooms, fresh farmed (common mushrooms (Agaricus bisporus),                                  |    |                     |    |    |     |    |    |      |    |     |    |    | 0.30 |    |    |    |   |

|                                                                                             |       |      |       |    |      |
|---------------------------------------------------------------------------------------------|-------|------|-------|----|------|
| shiitake mushrooms<br>(Lentinula edodes), and<br>oyster mushrooms<br>(Pleurotus ostreatus)) |       |      |       |    |      |
| Meat (cooked cured<br>chopped)                                                              |       |      |       | 50 |      |
| Meat (corned beef)                                                                          |       |      |       | 50 |      |
| Meat (luncheon)                                                                             |       |      |       | 50 |      |
| Meat and fat of poultry                                                                     |       |      |       |    | 0.10 |
| Meat of cattle, pig, and<br>sheep                                                           |       |      |       |    | 0.10 |
| Milk                                                                                        |       |      |       |    | 0.02 |
| Milk (secondary<br>products)                                                                |       |      |       |    | 0.02 |
| Natural mineral waters                                                                      | 0.001 | 0.01 | 0.003 |    | 0.01 |
| Olives (table)                                                                              |       |      |       |    | 0.40 |
| Pork (cooked cured<br>shoulder)                                                             |       |      |       | 50 |      |
| Pulses                                                                                      |       |      | 0.10  |    | 0.10 |
| Rice, husked                                                                                |       | 0.35 |       |    |      |
| Rice, polished                                                                              |       | 0.20 | 0.40  |    |      |
| Salt, food grade                                                                            | 0.1   | 0.50 | 0.50  |    | 1.00 |
| Tomatoes (preserved)                                                                        |       |      |       |    | 0.05 |
| Vegetables (brassica)                                                                       |       |      | 0.05  |    | 0.10 |
| Vegetables (bulb)                                                                           |       |      | 0.05  |    | 0.10 |
| Vegetables (canned)                                                                         |       |      |       |    | 0.10 |
| Vegetables (fruiting)                                                                       |       |      | 0.05  |    | 0.05 |
| Vegetables (leafy)                                                                          |       |      | 0.02  |    | 0.30 |
| Vegetables (legume)                                                                         |       |      | 0.10  |    | 0.10 |
| Vegetables (root and<br>tuber)                                                              |       |      | 0.10  |    | 0.10 |
| Vegetables (stalk and<br>stem)                                                              |       |      | 0.10  |    |      |
| Wheat                                                                                       |       |      | 0.20  |    |      |
| Wine                                                                                        |       |      |       |    | 0.10 |
| Wine (fortified / Liqueur)                                                                  |       |      |       |    | 0.15 |
| Wine (wine and fortified /<br>liqueur wine)                                                 |       |      |       |    | 0.20 |
| Medicinal                                                                                   |       |      | 0.3   |    | 10   |

---
