# Supplementary material for: Heavy Metal Bioaccumulation in Peruvian Food and Medicinal Products
Source: Foods. 2024 Feb 29;13(5):762. doi: 10.3390/foods13050762 (PMC10931273; doi:10.3390/foods13050762)
Supplement: Supplementary file 1 [file foods-13-00762-s001.zip]

Archive with 14 entries (14 files):
- Figure SI 1 c.pdf
- Figure SI 2 c.pdf
- Figure SI 3 c.pdf
- Figure SI 4 c.pdf
- Figure SI 5 c.pdf
- Figure SI 6 c.pdf
- Table SI 1b.pdf
- Table SI 2b.pdf
- Table SI 3b.pdf
- Table SI 4b.xlsx
- Table SI 5b.xlsx
- Table SI 6b.xlsx
- Table SI 7b.xlsx
- Table SI 8b.xlsx
