# Supplementary material for: Heavy Metal Bioaccumulation in Peruvian Food and Medicinal Products
Source: Foods. 2024 Feb 29;13(5):762. doi: 10.3390/foods13050762 (PMC10931273; doi:10.3390/foods13050762)
Supplement: Supplementary file 1 [file foods-13-00762-s001.zip › Table SI 4b.xlsx]

## Sheet: Sheet1
Table S4. Maximum metal concentrations of each plant-based edible/medicinal product found in Peruvian studies.
E = Edible
M = Medicinal
Black = Below MPLs (WHO)
Red = Above MPLs (WHO)
Blue = Not regulated by WHO
			Concentration (mg/Kg)
Species	Material	Department	Hg	Al	Sb	As	Ba	Be	Cd	Cr	Sn	Ni	Ag	Pb	Se	Tl	Ti	U	Comments	Source	Year
Leaves
Caimito (Pouteria caimito) M	Leaves	Amazonas							0.218											Oc Llatance et al. [100]	2018
Sapote (Matisia cordata) M	Leaves	Amazonas							0.061											Oc Llatance et al. [100]	2018
Ortiga (Malvaviscus sp.) M	Leaves	Amazonas							0											Oc Llatance et al. [100]	2018
Chope (Vochysia sp.) E	Leaves	Amazonas							0											Oc Llatance et al. [100]	2018
Pumpunaje (Carludovica palmata) E	Leaves	Amazonas							0.228											Oc Llatance et al. [100]	2018
Yarina (Attalea sp.) M	Leaves	Amazonas							0.087											Oc Llatance et al. [100]	2018
Cacao (Theobroma cacao) M	Leaves	Amazonas							0.509											Oc Llatance et al. [100]	2018
Giant reed (Arundo donax) E	Leaves	La Libertad							0.65967					2.21633						Escobar [200]	2019
Umbrella sedge (Cyperus alternifolius) M	Leaves	La Libertad							0.71987					2.47333						Escobar [200]	2019
Christmas candlestick (Leonotis nepetifolia) M	Leaves	La Libertad							0.81633					2.80517						Escobar [200]	2019
Rye grass (Lolium perenne) M	Leaves	Lima							4											Hernández [201]	2016
Oregano (Oreganum vulgare) E	Leaves	Tacna							0.0173					0.0047						Marín [202]	2019
Olive (Olea europaea) E	Leaves	Tacna							0.018					0.005						Marín [202]	2019
Chocho (Lupinus mutabilis) M	Leaves	La Libertad							16.5											Delgado [81]	2014
Cacao (Theobroma cacao) M	Leaves	San Martín							0.78											Santander and Mendieta [203]	2019
Eucalyptus (Eucalyptus globulus) M	Leaves	Junín				0.13			0.39					2.14						Zárate-Quiñones et al. [204]	2021
Muña (Minthostachys mollis) E	Leaves	Junín				0.06			0.06					1.84						Zárate-Quiñones et al. [204]	2021
Cacao (Theobroma cacao) M	Leaves	Tumbes							2.5											Arévalo-Gardini et al. [59]	2017
Cacao (Theobroma cacao) M	Leaves	Cajamarca										2.25		1.2						Arévalo-Gardini et al. [59]	2017
Cacao (Theobroma cacao) M	Leaves	Amazonas								2.86										Arévalo-Gardini et al. [59]	2017
Cacao (Theobroma cacao) M	Leaves	Huánuco								1										Arévalo-Gardini et al. [59]	2017
Cacao (Theobroma cacao) M	Leaves	Junín												2.5						Arévalo-Gardini et al. [59]	2017
Cacao (Theobroma cacao) M	Leaves	Cusco							0.23			12.2								Arévalo-Gardini et al. [59]	2017
Lettuce (Lactuca sativa) E	Leaves	Lima							0.438					7.189					Var. Crespa. Market	Madueño [205]	2017
Cotton (Gossypium barbadense) M	Leaves	Ica							2	7.86				11.45					Irrigated with sewer water. Var. Tangüis linaje ICA 161-71	Lovera [206]	2019
Remocaspi (Aspidosperma rigidum) M	Leaves	Loreto	6.66			21.92			5.39	15.6				1.76						Olortegui [93]	2021
Spinash (Spinacia oleracea) E	Leaves	Ayacucho							0.43	0.87				0.21					Irrigated with sewer water	Córdova [104]	2019
Spinash (Spinacia oleracea) E	Leaves	Ayacucho							0.19	1.63				0.44					Irrigated with minicipal water	Córdova [104]	2019
Lettuce (Lactuca sativa) E	Leaves	Ayacucho							0.19	1.6				0.28					Irrigated with sewer water	Córdova [104]	2019
Lettuce (Lactuca sativa) E	Leaves	Ayacucho							0.21	5.2				0.57					Irrigated with minicipal water	Córdova [104]	2019
Cacao (Theobroma cacao) M	Leaves	San Martín							3.39					27.04						Sánchez [207]	2017
Cacao (Theobroma cacao) M	Leaves	Huánuco							1.37										Traditional system	Villanueva [208]	2019
Cacao (Theobroma cacao) M	Leaves	Huánuco							1.34										Organic system	Villanueva [208]	2019
Cacao (Theobroma cacao) M	Leaves	Huánuco							1.39										Conventional system	Villanueva [208]	2019
Senecio (Senecio collinus) M	Leaves	Pasco							0.86					5.13						Gómez [209]	2019
Pennywort (Hydrocotyle vulgaris) M	Leaves	Pasco							0.77					4.35						Tapia [210]	2020
Tarwi (Lupinus mutabilis) M	Leaves	Arequipa				2.833			0.0676					0.53					Agricultural soil, with distilled water	Chuquitoma [211]	2022
Cacao (Theobroma cacao) M	Leaves	Puno							0.6918											Calla [212]	2021
California bulrush (Scirpus californicus) M	Leaves	Junín												2.453						Bernabé [213]	2020
Sunflower (Helianthus annuus) M	Leaves	La Libertad												0.63						García [214]	2009
Cacao (Theobroma cacao) M	Leaves	Amazonas							0.23										Genotype JSM 3	Meléndez [215]	2021
Cacao (Theobroma cacao) M	Leaves	Amazonas							0.17										Genotype INDES 38	Meléndez [215]	2021
Cacao (Theobroma cacao) M	Leaves	Amazonas							0.4										Genotype JMB 1	Meléndez [215]	2021
Cacao (Theobroma cacao) M	Leaves	Amazonas							0.31										Genotype INDES 39	Meléndez [215]	2021
Cacao (Theobroma cacao) M	Leaves	Amazonas							0.74										Genotype JSM 2	Meléndez [215]	2021
Potato (Solanum tuberosum) M	Leaves	Amazonas							11.13											Camas and Valqui [83]	2016
Shihuahuaco (Dipteryx odorata) M	Leaves	Ucayali							0.91					3.39						Rios [216]	2016
Cacao (Theobroma cacao) M	Leaves	Ucayali							0.83					3.43					Benotype IMC67	López et al. [217]	2016
Cacao (Theobroma cacao) M	Leaves	Ucayali							0.73					2.48					Genotype POUND12	López et al. [217]	2016
Cacao (Theobroma cacao) M	Leaves	Ucayali							0.89					3.8					Genotype SCA6	López et al. [217]	2016
Cacao (Theobroma cacao) M	Leaves	Ucayali							0.8					2.61					Genotype ICS1	López et al. [217]	2016
Cacao (Theobroma cacao) M	Leaves	Ucayali							0.54					3.81					Genotype ICS95	López et al. [217]	2016
Cacao (Theobroma cacao) M	Leaves	Ucayali							0.63					3.53					Genotype UF29	López et al. [217]	2016
Cacao (Theobroma cacao) M	Leaves	Ucayali							0.59					4.14					Genotype CCN51	López et al. [217]	2016
Cacao (Theobroma cacao) M	Leaves	Ucayali							0.79					2.55					Genotype ICS6	López et al. [217]	2016
Cacao (Theobroma cacao) M	Leaves	Ucayali							0.83					3.43					Genotype IMC67	Cartagena [218]	2018
Cacao (Theobroma cacao) M	Leaves	Ucayali							0.73					2.48					Genotype POUND12	Cartagena [218]	2018
Cacao (Theobroma cacao) M	Leaves	Ucayali							0.89					3.8					Genotype CSCA6	Cartagena [218]	2018
Cacao (Theobroma cacao) M	Leaves	Ucayali							0.8					2.61					Genotype ICS1	Cartagena [218]	2018
Cacao (Theobroma cacao) M	Leaves	Ucayali							0.54					3.81					Genotype ICS95	Cartagena [218]	2018
Cacao (Theobroma cacao) M	Leaves	Ucayali							0.63					3.53					Genotype UF29	Cartagena [218]	2018
Cacao (Theobroma cacao) M	Leaves	Ucayali							0.59					4.14					Genotype CCN51	Cartagena [218]	2018
Cacao (Theobroma cacao) M	Leaves	Ucayali							0.79					2.55					Genotype ICS6	Cartagena [218]	2018
Cacao (Theobroma cacao) M	Leaves	Ucayali							1.74										Organic system	Ramírez [219]	2018
Cacao (Theobroma cacao) M	Leaves	Ucayali							2.21										Chemical system	Ramírez [219]	2018
Cacao (Theobroma cacao) M	Leaves	Ucayali							1.25										Traditional system	Ramírez [219]	2018
Chuchuhuasi (Maytenus macrocarpa) M	Leaves	Loreto							0.277	1.651				1.16						Apaclla and Pezo [220]	2015
Camu camu (Myrciaria dubia) M	Leaves	Loreto							0											Panduro and Soria [221]	2015
Puspo bean (Cajanus cajan) M	Leaves	Loreto							0.1833											Panduro and Soria [221]	2015
Clavo huasca (Tynanthus panurensis) M	Leaves	Loreto							0.241	1.59				2.195						García and Uribe [222]	2015
Yuca (Manihot esculenta) M	Leaves	Loreto							0.03	5.1				2.85					Fresh leaves (medicinal leaves)	Calloapaza [99]	2022
Huacapurana (Campsiandra angustifolia) M	Leaves	Loreto							0.38	17.5				1.56						Medina and Taminche [94]	2015
Lettuce (Lactuca sativa) E	Leaves	Lima				0.1036			0.0493	0.0677				0.0364						Chambergo [223]	2020
Cilantro (Coriandrum sativum) E	Leaves	Cusco	0						0										Dry leaves	Choque [101]	2020
Corn (Zea mays) M	Leaves	Lima							1.93					4.81					Hard corn INIA 611 NUTRI-PERÚ	Flores [85]	2019
Sauce de Venezuela (Tessaria integrifolia) M	Leaves	La Libertad	0.304			1.267			0.645					8.397					Leaves BS	Castillo and Ibañez [224]	2017
Sauce de Venezuela (Tessaria integrifolia) M	Leaves	La Libertad	0.073			0.308			0.155					2.022					Leaves BH	Castillo and Ibañez [224]	2017
Lettuce (Lactuca sativa) E	Leaves	La Libertad												0.02927						Paredes and Siccha [225]	2020
Cilantro (Coriandrum sativum) E	Leaves	La Libertad												0.00901						Paredes and Siccha [225]	2020
Cabbage (Brassica oleracea) E	Leaves	La Libertad												0.0063						Paredes and Siccha [225]	2020
Spinash (Spinacia oleracea) E	Leaves	La Libertad												0.02077						Paredes and Siccha [225]	2020
Corn (Zea mays) M	Leaves	Lima							0.0083					0.055					Hybrid PMX-5	Ostolaza [226]	2020
Queñua (Polylepis sp.) M	Leaves	Pasco												228.58					Near mining operation	De La Cruz [86]	2021
Cacao (Theobroma cacao) M	Leaves	Junín							2.3											Cusi [227]	2022
Cacao (Theobroma cacao) M	Leaves	Piura							7											Aguirre [228]	2020
Cacao (Theobroma cacao) M	Leaves	Huánuco							3.195					14.255						García [89]	2018
Cacao (Theobroma cacao) M	Leaves	Huánuco							2.84										Organic. Genotype CCN51	Cárdenas [229]	2013
Cacao (Theobroma cacao) M	Leaves	Huánuco							1.44										Genotype CCN51	Tantalean [230]	2017
Cacao (Theobroma cacao) M	Leaves	San Martín							2.84										Genotype CCN51	Tantalean [230]	2017
Camu camu (Myrciaria dubia) M	Leaves	Ucayali							0.004	0				0					Brotam stage I	Panduro [102]	2015
Camu camu (Myrciaria dubia) M	Leaves	Ucayali							0.009	0				0					Brotam stage II	Panduro [102]	2015
Camu camu (Myrciaria dubia) M	Leaves	Ucayali							0.01	0				0					Fruictification stage	Panduro [102]	2015
Camu camu (Myrciaria dubia) M	Leaves	Ucayali							0.02	0				0					Fruit filling stage	Panduro [102]	2015
Camu camu (Myrciaria dubia) M	Leaves	Ucayali							0.022	0				0					Mature fruit stage	Panduro [102]	2015
Cacao (Theobroma Cacao) M	Leaves	Huánuco							1.255											Palacin [231]	2020
Cacao (Theobroma Cacao) M	Leaves	Huánuco							1.292										With 20 g/Kg of biochar	Palacin [231]	2020
Yuca (Manihot esculenta) M	Leaves	Madre de Dios	0			0			0.125					0.02						Soto-Benavente et al. [61]	2020
Banana (Musa paradisiaca) E	Leaves	Madre de Dios	0			0			0					0.025						Soto-Benavente et al. [61]	2020
Guaba (Inga edulis) M	Leaves	Loreto	0.03						0.014					0.237						Contreras [232]	2022
Asparragus (Asparagus officinalis) M	Leaves	Ica							1.74										Variety UC-157 F1. With fungizide	Rodríguez [84]	2022
Asparragus (Asparagus officinalis) M	Leaves	Ica							1.4										Variety UC-157 F1. No fungicide	Rodríguez [84]	2022
Canarian bean (Phaseolus Vulgaris) M	Leaves	La Libertad		9										15						Reyes [233]	2013
Panamito bean (Phaseolus Vulgaris) M	Leaves	La Libertad		32										38						Reyes [233]	2013
Berro (Nasturtium officinale) E	Leaves	Huancavelca							0											Ñahui [234]	2021
Common horsetail (Equisetum arvense) M	Leaves	Huancavelca												0						Ñahui [234]	2021
Romaza (Rumex crispus) E	Leaves	Huancavelca								0										Ñahui [234]	2021
Cacao (Theobroma cacao) M	Leaves	Amazonas							1.39										Var. CCN51	Tuesta [235]	2022
Cacao (Theobroma cacao) M	Leaves	Amazonas							0.87											Tuesta [235]	2022
Lettuce (Lactuca sativa var. Sharp shooter) E	Leaves	La Libertad												0						Moreno [236]	2013
Acorn squash (Cucurbita pepo) M	Leaves	Junín				1.2			0.1					0.5						Rosales [237]	2020
Cacao (Theobroma cacao) M	Leaves	Piura							1.19											Zurita [238]	2022
Cacao (Theobroma cacao) M	Leaves	Piura							1.8											Flores [239]	2022
Underground components
Onion (Allium cepa) E	Bulb	Arequipa	0.02	0	0	0.5	1.7	0	0.11	0	0	0	0	0	0	0	0	0		OEFA [90]	2017
Onion (Allium fistulosum and Allim cepa) E	Bulb	Amazonas				0.23			0	0.01				0.2						Grandez [240]	2021
Onion (Allium cepa) E	Tissue	Arequipa												0.1767						Bolivar [241]	2014
Onion (Allium cepa) E	Tissue	Arequipa												0.2267					Cultivated with bioaccumulating plant species	Bolivar [241]	2014
Onion (Allium fistulosum) E	Scale	La Libertad												0.02916						Paredes and Siccha [225]	2020
Garlic (Allium sativum) E	Bulb	Arequipa	0.017			0.017			0.012	0				0.013						Quispe [63]	2019
Poro (Allium schoenoprasum) E	Bulb	Arequipa	0.006			0.075			0.023	0				0.015						Quispe [63]	2019
Puerro (Allium ampeloprasum) E	Bulb	Arequipa	0.006			0.075			0.023	0				0.014					Var. Porrum	Quispe et al. [242]	2021
Garlic (Allium sativum) E	Bulb	Arequipa	0.017			0.017			0.012	0				0.013						Quispe et al. [242]	2021
Nettle (Malvaviscus sp.) M	Root	Amazonas							0.297											Oc Llatance et al. [100]	2018
Pumpunaje (Carludovica palmata) M	Root	Amazonas							0.335											Oc Llatance et al. [100]	2018
Yarina (Attalea sp.) M	Root	Amazonas							0											Oc Llatance et al. [100]	2018
Cacao (Theobroma cacao) M	Root	Amazonas							1.684											Oc Llatance et al. [100]	2018
Gian reed (Arundo donax) M	Root	La Libertad							1.05197					6.52217					In alluvial sediments. Contaminated watershed	Escobar [200]	2019
Umbrella sedge (Cyperus alternifolius) M	Root	La Libertad							1.69323					3.58117					In alluvial sediments. Contaminated watershed	Escobar [200]	2019
Christmas candlestick (Leonotis nepetifolia) M	Root	La Libertad							1.2475					4.03633					In alluvial sediments. Contaminated watershed	Escobar [200]	2019
Pineapple (Ananas comosus) M	Root	Cajamarca												0						Pereyra [243]	2019
Chocho (Lupinus mutabilis) M	Root	La Libertad							46.4											Delgado [81]	2014
Espino (Acacia macracantha) M	Root	La Libertad												0						Blaz [244]	2015
Onion (Allium cepa) E	Bulb	Arequipa				0.052			0.11											Juan De Dios [65]	2018
Cotton (Gossypium barbadense) M	Root	Ica							0.53	0.58				2.11					Var. Tangüis linaje ICA 161-71	Lovera [206]	2019
Pastureweed (Cyathula prostrata) M	Root	Huánuco							11.15										Male (in agricultural soil)	Fernández [82]	2019
Spreading dayflower (Commelina difusa) M	Root	Huánuco							4.33										Male (in agricultural soil)	Fernández [82]	2019
Wild poinsettia (Euphorbia heterophylla) M	Root	Huánuco							6.13										Male (in agricultural soil)	Fernández [82]	2019
Potato (Solanum tuberosum) E	Tuber	Cajamarca							0.3232					0						Luna and Rodríguez [67]	2016
Radish (Raphanus sativus) E	Tuber	Ayacucho							0	1.47				0.29					Irrigated with sewer water	Córdova [104]	2019
Radish (Raphanus sativus) E	Tuber	Ayacucho							0	0.95				0.27					Irrigated with drinking water	Córdova [104]	2019
White potato var. Canchán (Solanum tuberosum) E	Tuber	Ayacucho				0.38														Tello [245]	2011
White potato var. Mariva (Solanum tuberosum) E	Tuber	Ayacucho				0.36														Tello [245]	2011
White potato var. Tomasa (Solanum tuberosum) E	Tuber	Ayacucho				0.34														Tello [245]	2011
White potato var. Yungay (Solanum tuberosum) E	Tuber	Ayacucho				0.51														Tello [245]	2011
Senecio (Senecio collinus) M	Root	Pasco							0.54					4.45						Gómez [209]	2019
Pennywort (Hydrocotyle vulgaris) M	Root	Pasco							0.03					8.34					Natural water	Tapia [210]	2020
Cacao (Theobroma cacao) M	Root	Puno							0.2402											Calla [212]	2021
Sunflower (Helianthus annuus) M	Root	La Libertad												1.16						García [214]	2009
Cabbage (Brassica oleracea) M	Root	La Libertad							0					0						Guerrero y Hoyos [103]	2014
Radish (Raphanus sativus) E	Root	La Libertad							0					0						Guerrero y Hoyos [103]	2014
Cultivated grass. Lolium (Lolium perenne), Orchard Grass (Dactylis glomerata), and White clover (Trifolium repens) M	Root	Junín							3.432										Dry season	Gómez [246]	2021
Cultivated grass Lolium (Lolium perenne), Orchard Grass (Dactylis glomerata), and White clover (Trifolium repens) M	Root	Junín							4.563										Wet season	Gómez [246]	2021
Natural grass (Festuca dolichophylla), Catalina grass (Dissanthelium calycinum), Carex ecuadorica, Waripsike Psiñe de burro (Hypochoeris taraxacoides), and Sillu Sillu (Alchemilla pinnata) M	Root	Junín							3.386										Dry season. Chilliwa	Gómez [246]	2021
Natural grass Chilliwa (Festuca dolichophylla), Catalina grass (Dissanthelium calycinum), Carex ecuadorica, Waripsike Psiñe de burro (Hypochoeris taraxacoides), and Sillu Sillu (Alchemilla pinnata) M	Root	Junín							4.538										Wet season	Gómez [246]	2021
Grass Rye grass (Lolium multiflorum) and White clover (Trifolium repens) M	Root	Junín							8.37											Huacho [247]	2022
Ichu (Stypa ichu) M	Root	Pasco							8.86					4.97						Ricapa [144]	2020
Ulluco (Ullucus tuberosus) E	Tuber	Huancavelica				0.2													Subsp. Aborigineus	García [248]	2021
Potato (Solanum tuberosum) E	Tuber	Amazonas							0.44											Camas and Valqui [83]	2016
Chuchuhuasi (Maytenus macrocarpa) M	Root	Loreto							0.344	10.422				0.478						Apaclla and Pezo [220]	2015
White clove (Tynanthus panurensis) M	Root	Loreto							0.556	1.673				3.478						García and Uribe [222]	2015
Yuca (Manihot esculenta) E	Tuber (root)	Loreto							0.03	4.1				0.76						Calloapaza [99]	2022
Huacapurana (Campsiandra angustifolia) M	Root	Loreto							0.56	1.57				3.3						Medina and Taminche [94]	2015
Corn (Zea mays) M	Root	Lima							1.65					8.84					Genotype INIA611 NUTRI-PERÚ	Flores [85]	2019
Corn (Zea mays) M	Root	Lima							0.0283					0.029					Genotype PMX5	Ostolaza [226]	2020
Cacao (Theobroma cacao) M	Root	Huánuco							1.22										Genotype CCN51	Tantalean [230]	2017
Cacao (Theobroma cacao) M	Root	San Martín							1.14										Genotype CCN51	Tantalean [230]	2017
Potato (Solanum tuberosum) E	Edible portion	Ancash							0.102					1.814						Balbín and Estacio [249]	2013
Yuca (Manihot esculenta) E	Root	Madre de Dios	0			0.05			0					0.022						Soto-Benavente et al. [61]	2020
Banana (Musa paradisiaca) M	Root	Madre de Dios	0.281			0.653			0.177					0.847						Soto-Benavente et al. [61]	2020
Cacao var. CCN51 (Theobroma cacao) M	Root	Amazonas							0.76											Tuesta [235]	2022
Cacao (Theobroma cacao) M	Root	Amazonas							0.54											Tuesta [235]	2022
Cortadera (Cortaderia rudiuscula) M	Root	La Libertad												0.057						Carrera and Abanto [250]	2018
Cortadera (Cortaderia rudiuscula) M	Root	La Libertad												0.448						Altamirano and Beltran [251]	2017
Canarian bean (Phaseolus Vulgaris) M	Root	La Libertad		13										15						Reyes [233]	2013
Panamito bean (Phaseolus Vulgaris) M	Root	La Libertad		36										38						Reyes [233]	2013
Acorn squash (Cucurbita pepo) M	Root	Junín				2.81			0.3					1.39						Rosales [237]	2020
Common dandelion (Taraxacum officinale) M	Root	Cusco							0.014	1.153				1.543						Callo [252]	2022
Pilli Pilli (Hypochaeris meyeniana) M	Root	Cusco							0.023	0.557				0.087						Callo [252]	2022
Puna llantén (Plantago australis subsp hirtella) M	Root	Cusco							0.021	3.347				3.2						Callo [252]	2022
Berro (Nasturtium officinale) M	Root	Huancavelca							0											Ñahui [234]	2021
Common horsetail (Equisetum arvense) M	Root	Huancavelca												0						Ñahui [234]	2021
Romaza (Rumex crispus) M	Root	Huancavelca								0										Ñahui [234]	2021
Fruits and grains
Pomegranate (Punica granatum) E	Fruit	Arequipa	0.02	0	0	0.4	0.2	0	0.04	0	0	0	0	0	0	0	0.25	0		OEFA [90]	2017
Olive (Olea europaea) E	Fruit	Arequipa	0.02	0	0	0.8	0.3	0	0	0	0	0	0	0	0	0	0.6	0		OEFA [90]	2017
Rice (Oryza sativa) E	Grain	Arequipa	0.02	58	0	0.6	2.1	0	0.21	0.7	0	0.3	0	0.2	0	0	1.8	0		OEFA [90]	2017
Quinua (Chenopodium quinoa) E	Grain	Arequipa	0.0032			0.06			0.02		0			0.04						Román-Ochoa et al. [64]	2021
Bean (Phaseolus vulgaris) E	Grain	Arequipa	0.0034			0.02			0.01		0.01			0.01						Román-Ochoa et al. [64]	2021
Rice (Oryza sativa) E	Grain	Arequipa	0.0036			0.17			0.11		0.03			0.04						Román-Ochoa et al. [64]	2021
Corn (Zea mays) E	Grain	Arequipa	0.0032			0.03			0		0			0.01						Román-Ochoa et al. [64]	2021
Cacao (Theobroma cacao) E	Fruit	Amazonas							0.411											Oc Llatance et al. [100]	2018
Olive (Olea europaea) E	Pulp	Tacna							0.014					0.004						Marín [202]	2019
Cacao (Theobroma cacao) E	Cob	San Martín							0.24											Dionisio [253]	2020
Corn (Zea mays) E	Grain	Ica												0.1524						Caso [254]	2020
Eucalyptus (Eucalyptus globulus) M	Flower	Junín												1.5507						Párraga and Pizarro [155]	2017
Banana (Musa paradisiaca) E	Fruit	Piura	0			0			0					0					Organic. Var. Cavendish. ASPRAOSRA Company	Falero [105]	2021
Banana (Musa paradisiaca) E	Fruit	Piura	0			0			0					0					Organic. Var. Cavendish. ASPROBO Company	Falero [105]	2021
Banana (Musa paradisiaca) E	Fruit	Madre de Dios	0.09																Genotype AAB, subgroup Plantain	Arostegui [255]	2017
Banana (Musa paradisiaca) E	Fruit	Piura				0			0					0.09						Calderón and Concha [56]	2012
Mango (Mangifera indica) E	Fruit	Piura				0			0					0.087						Calderón and Concha [56]	2012
Papaya (Carica papaya) E	Fruit	Piura				0.2			0					0.09						Calderón and Concha [56]	2012
Apple (Malus domestica) E	Fruit	Lima				0.05			0					0.1						Calderón and Concha [56]	2012
Orange (Citrus sinensis) E	Fruit	Piura - Lima				0			0					0.1						Calderón and Concha [56]	2012
Strawberry (Fragaria vesca) E	Fruit	La Libertad				0			0					0.2					Market fruuits	Calderón and Concha [56]	2012
Avocado (Persea americana) E	Fruit	Piura				0			0					0.18					Market fruuits	Calderón and Concha [56]	2012
Lime (Citrus latifolia) E	Fruit	La Libertad				0			0.065					0.12					Market fruuits	Calderón and Concha [56]	2012
Plum (Prunus domestica) E	Fruit	Piura				0			0.023					0.2					Market fruuits	Calderón and Concha [56]	2012
Watermelon (Citrullus lanatus) E	Fruit	La Libertad				0			0					0.09						Calderón and Concha [56]	2012
Tomato (Solanum lycopersicum) E	Fruit	Amazonas				0.25			0	0				0.21					Edible part (market fruit)	Grandez [240]	2021
Eucalyptus (Eucalyptus globulus) M	Flower	Junín												0.54					Infloresence	Huamán [256]	2014
Corn (Zea mays) E	Grain	Lima							3.0051					5.0449					Genotype INIA611	Flores [85]	2019
Corn (Zea mays) E	Crown	Lima							0.4663					13.074					Genotype INIA611	Flores [85]	2019
Asparragus (Asparagus officinalis) E	Crown	Ica							3.75										Var. UC-157 F1	Rodríguez [84]	2022
Cansa boca (Bunchosia armeniaca) E	Mesocarp	La Libertad	0.1005			0.1341			0.0032					0.016						Ocaña and Tadeo [257]	2019
Sweet granadilla (Passiflora ligularis) E	Fruit	Pasco	0.002			0.004			0.004					0.005						Buendia [258]	2018
Camu camu (Myrciaria dubia) E	Fruit	Ucayali							0	0				0					Fructification stage	Panduro [102]	2015
Camu camu (Myrciaria dubia) E	Fruit	Ucayali							0	0				0					Fruit filling stage	Panduro [102]	2015
Corn (Zea mays) E	Grain	Junín												0.73						Escobar [259]	2019
Cacao (Theobroma cacao) E	Fruit	Huánuco							1.19					9.895					Endocarp	García [89]	2018
Winter squash (Cucurbita maxima) E	Edible portion	Ica				0.16								0.182					From Lima market	Castillo and Dominguez [260]	2021
Winter squash (Cucurbita maxima) E	Edible portion	Arequipa				0.436								0.259					From Lima market	Castillo and Dominguez [260]	2021
Winter squash (Cucurbita maxima) E	Edible portion	Huánuco				0.219								0.173					From Lima market	Castillo and Dominguez [260]	2021
Winter squash (Cucurbita maxima) E	Edible portion	Lima				0.13								0.115					From Lima market	Castillo and Dominguez [260]	2021
Tomato (Solanum lycopersicum var. Saladette) E	Edible portion	Ica				0.195								0.199					From Lima market	Castillo and Dominguez [260]	2021
Tomato (Solanum lycopersicum var. Saladette) E	Edible portion	Arequipa				0.44								0.218					From Lima market	Castillo and Dominguez [260]	2021
Tomato (Solanum lycopersicum var. Saladette) E	Edible portion	Ancash				0.24								0.022					From Lima market	Castillo and Dominguez [260]	2021
Tomato (Solanum lycopersicum var. Saladette) E	Edible portion	Lima				0.316								0.099					From Lima market	Castillo and Dominguez [260]	2021
Guaba (Inga edulis) E	Fruit	Loreto	0.013						0.023					0.085						Contreras [232]	2022
Rocoto (Capsicum pubescens) E	Fruit	Pasco							0.016					0						Soto [261]	2022
Blueberry (Vaccinium corymbosum L.) E	Fruit	Lima							0	0.137				0.288					Chorrillos market	Villanueva [262]	2022
Acorn squash (Cucurbita pepo) E	Fruit	Junín				0			0					0						Rosales [237]	2020
Seed and their parts
Cacao (Theobroma cacao) E	Seed	San Martín							0.95											Dionisio [253]	2020
Cacao (Theobroma cacao) E	Seed	San Martín							1.66											Dionisio [253]	2020
Cacao (Theobroma cacao) E	Seed	San Martín							0.075										Dry seed	Santander and Mendieta [203]	2019
Cacao (Theobroma cacao) E	Dry seed	San Martín							0.058											Santander and Mendieta [203]	2019
Cacao (Theobroma cacao) E	Seed	Tumbes							1.78			3.5								Arévalo-Gardini et al. [59]	2017
Cacao (Theobroma cacao) E	Seed	Piura												3.78						Arévalo-Gardini et al. [59]	2017
Cacao (Theobroma cacao) E	Seed	Cajamarca												1						Arévalo-Gardini et al. [59]	2017
Cacao (Theobroma cacao) E	Seed	Amazonas								4.83										Arévalo-Gardini et al. [59]	2017
Cacao (Theobroma cacao) E	Seed	San Martín								1										Arévalo-Gardini et al. [59]	2017
Cacao (Theobroma cacao) E	Seed	Huánuco										9.25								Arévalo-Gardini et al. [59]	2017
Cacao (Theobroma cacao) E	Seed	Cusco							0.17					1						Arévalo-Gardini et al. [59]	2017
Habas (Vicia faba) E	Seed	Lima				0			0.09716											Basualdo and Yacila [263]	2015
Cacao (Theobroma cacao) E	Seed	Ayacucho							0.186					2.88						Huashuayo [264]	2021
Cacao (Theobroma cacao) E	Seed	Huánuco							0.79										Traditional system	Villanueva [208]	2019
Cacao (Theobroma cacao) E	Seed	Huánuco							0.96										Organic system	Villanueva [208]	2019
Cacao (Theobroma cacao) E	Seed	Huánuco							1.07										Conventional system	Villanueva [208]	2019
Cacao (Theobroma cacao) E	Cotyledon	San Martín							0.098											Santander and Mendieta [203]	2019
Cacao (Theobroma cacao) E	Seed	San Martín							3.09					25.98						Sánchez [207]	2017
Cacao (Theobroma cacao) E	Cotyledon	San Martín							1.491	0				0						Fonseca [265]	2021
Cacao (Theobroma cacao) E	Seed	Huánuco																		Lino [266]	2019
Cacao (Theobroma cacao) E	Seed	Puno							0.325											Calla [212]	2021
Coffee (Coffea arabica) E	Seed	Cajamarca							0.59										Dry seed	Pintado and Mego [267]	2019
Coffee (Coffea arabica) E	Seed	Cajamarca							0										Fresh seed	Pintado and Mego [267]	2019
Ichu (Stypa Ichu) M	Seed	Pasco							0.91					0.26					Non-disturbed soil	Ricapa [144]	2020
Cacao (Theobroma cacao) E	Testa	San Martín							0.055											Venturo [268]	2019
Cacao (Theobroma cacao) E	Cotyledon	San Martín							0.067											Venturo [268]	2019
Cacao (Theobroma cacao) E	Seed	Cajamarca							0.09											Julca [269]	2020
Cacao (Theobroma cacao) E	Seed	Cajamarca							0.19										Organic. Fresh seed	López and Incio [270]	2022
Cacao (Theobroma cacao) E	Seed	Cajamarca							0.64										Organic. Dry seed	López and Incio [270]	2022
Cacao (Theobroma cacao) E	Seed	Cajamarca							0.88										Organic. Toasted seed	López and Incio [270]	2022
Cacao (Theobroma cacao) E	Seed	Ucayali												6.6					Genotype CNN51	Mera [271]	2017
Cacao (Theobroma cacao) E	Seed	Ucayali												6.8					Var. Hybrid	Mera [271]	2017
Cacao (Theobroma cacao) E	Seed	Ucayali							0.62					1.71					Genotype IMC67	López et al. [217]	2016
Cacao (Theobroma cacao) E	Seed	Ucayali							0.37					1.5					Genotype POUND12	López et al. [217]	2016
Cacao (Theobroma cacao) E	Seed	Ucayali							0.59					2.07					Genotype SCA6	López et al. [217]	2016
Cacao (Theobroma cacao) E	Seed	Ucayali							1.18					1.08					Genotype ICS1	López et al. [217]	2016
Cacao (Theobroma cacao) E	Seed	Ucayali							0.57					2.3					Genotype ICS95	López et al. [217]	2016
Cacao (Theobroma cacao) E	Seed	Ucayali							0.5					1.48					Genotype UF29	López et al. [217]	2016
Cacao (Theobroma cacao) E	Seed	Ucayali							0.33					2.05					Genotype CCN51	López et al. [217]	2016
Cacao (Theobroma cacao) E	Seed	Ucayali							0.76					2					Genotype ICS6	López et al. [217]	2016
Cacao (Theobroma cacao) E	Seed	Ucayali							0.62					1.71					Genotype IMC67	Cartagena [218]	2018
Cacao (Theobroma cacao) E	Seed	Ucayali							0.37					1.5					Genotype POUND12	Cartagena [218]	2018
Cacao (Theobroma cacao) E	Seed	Ucayali							0.59					2.07					Genotype SCA6	Cartagena [218]	2018
Cacao (Theobroma cacao) E	Seed	Ucayali							1.18					1.08					Genotype ICS1	Cartagena [218]	2018
Cacao (Theobroma cacao) E	Seed	Ucayali							0.57					2.3					Genotype ICS95	Cartagena [218]	2018
Cacao (Theobroma cacao) E	Seed	Ucayali							0.5					1.48					Genotype UF29	Cartagena [218]	2018
Cacao (Theobroma cacao) E	Seed	Ucayali							0.33					2.05					Genotype CCN51	Cartagena [218]	2018
Cacao (Theobroma cacao) E	Seed	Ucayali							0.76					2					Genotype ICS6	Cartagena [218]	2018
Cacao (Theobroma cacao) E	Seed	Ucayali							1.02										Organic system. Genotype CCN51	López and Hoyos [272]	2018
Cacao (Theobroma cacao) E	Seed	Ucayali							1.21										Chemical system. Genotype CCN51	López and Hoyos [272]	2018
Cacao (Theobroma cacao) E	Seed	Ucayali							0.82										Traditional system. Genotype CCN51	López and Hoyos [272]	2018
Cacao (Theobroma cacao) E	Seed	Junín							2.7											Cusi [227]	2022
Cacao (Theobroma cacao) E	Seed	Piura							3.14											Aguirre [228]	2020
Cacao (Theobroma cacao) E	Seed	Huánuco							1.55										Organic. Genotype CCN51	Cárdenas [229]	2013
Cacao (Theobroma cacao) E	Seed	Junín							0.774											Alcala [273]	2021
Cacao (Theobroma cacao) E	Seed	Huánuco							1.72					6.244						García [89]	2018
Cacao (Theobroma cacao) E	Seed	Huánuco							0.84										Genotype CCN51	Tantalean [230]	2017
Cacao (Theobroma cacao) E	Seed	San Martín							1.08										Genotype CCN51	Tantalean [230]	2017
Cacao (Theobroma cacao) E	Seed	Huánuco							0.04					6.14					Fresh seed	Del Aguila [274]	2017
Cacao (Theobroma cacao) E	Seed	Huánuco							0.06					6.4					Dry seed	Del Aguila [274]	2017
Cacao (Theobroma cacao) E	Seed	Junín							0.02					5.87					Fresh seed	Del Aguila [274]	2017
Cacao (Theobroma cacao) E	Seed	Junín							0.05					7.62					Dry seed	Del Aguila [274]	2017
Cacao (Theobroma cacao) E	Seed	Ucayali							0.08					9.02					Fresh seed (local cacao producers)	Del Aguila [274]	2017
Cacao (Theobroma cacao) E	Seed	Ucayali							0.11					5.53					Dry seed (local cacao producers)	Del Aguila [274]	2017
Cacao (Theobroma cacao) E	Seed	Huánuco							1.2					3.05					Var. Criollo. Fresh seed	Tolentino [275]	2018
Cacao (Theobroma cacao) E	Seed	Huánuco							1.21					4.48					Fresh seed	Tolentino [275]	2018
Cacao (Theobroma cacao) E	Seed	Huánuco							1.18					4.66					Fresh seed. Genotype CCN51	Tolentino [275]	2018
Cacao (Theobroma cacao) E	Seed	Huánuco							0.09					4.39					Fresh seed. Genotype FC2	Tolentino [275]	2018
Cacao (Theobroma cacao) E	Seed	Huánuco							0.08					2.93					Fresh seed. Genotype FC3	Tolentino [275]	2018
Cacao (Theobroma cacao) E	Seed	Huánuco							0.05					3.19					Fresh seed. Genotype FC4	Tolentino [275]	2018
Cacao (Theobroma cacao) E	Seed	Huánuco							0.33					3.91					Fresh seed. Genotype VPA1	Tolentino [275]	2018
Cacao (Theobroma cacao) E	Seed	Huánuco							0.33					4.46					Fresh seed. Genotype VPA2	Tolentino [275]	2018
Cacao (Theobroma cacao) E	Seed	Huánuco							0.42					4.55					Fresh seed. Genotype ICS95	Tolentino [275]	2018
Cacao (Theobroma cacao) E	Seed	Huánuco							0.14					1.33					Var. Criollo morado. Fresh seed	Tolentino [275]	2018
Cacao (Theobroma cacao) E	Seed	Huánuco							2.45											Llactas [276]	2016
Cacao (Theobroma cacao) E	Seed	Huánuco							0.44											Chávez [277]	2020
Cacao (Theobroma cacao) E	Seed	Huánuco							0.415										With 25 Mg/ha organic matter from cacao prunning and harvesting waste	Chávez [277]	2020
Cacao (Theobroma cacao) E	Cotyledon	Huánuco							1.21										Non-fermented seed. Genotype CCN51	Falcón [278]	2019
Cacao (Theobroma cacao) E	Seed	Huánuco							0.94											Palacin [231]	2020
Cacao (Theobroma cacao) E	Seed	Huánuco							0.875										With 20 g/Kg of biochar	Palacin [231]	2020
Cansaboca (Bunchosia armeniaca) E	Endocarp	La Libertad	0.072			0.0646			0.0009					0.0152						Ocaña and Tadeo [257]	2019
Cacao (Theobroma cacao) E	Seed	Amazonas							0.28										Variedad CCN51	Tuesta [235]	2022
Cacao (Theobroma cacao) E	Seed	Amazonas							0.33										Common	Tuesta [235]	2022
Cacao (Theobroma cacao) E	Seed	Ucayali							1.69											Marín [279]	2022
Cacao (Theobroma cacao) E	Seed	Cusco							6.9					30.9					Common (hybrid) in cacao soil	Flores [95]	2021
Cacao (Theobroma cacao) E	Seed	Cusco							4.1					24.1					CCN-51 in cacao soil	Flores [95]	2021
Cacao (Theobroma cacao) E	Seed	Cusco							2.1					9.1					VRAE-15	Flores [95]	2021
Cañihua (Chenopodium pallidicaule Aellen) E	Seed	Puno	0.0032						0.132											Huaquipaco [280]	2022
Cacao (Theobroma cacao) E	Seed	Piura							0.48											Zurita [238]	2022
Cacao (Theobroma cacao) E	Seed	Piura							0.9											Flores [239]	2022
Coffee (Coffea arabica) E	Seed (raw)	Cajamarca							0.574											Mundaca and Huamán [281]	2021
Coffee (Coffea arabica) E	Seed (green)	Cajamarca							0.388											Mundaca and Huamán [281]	2021
Cacao (Theobroma cacao) E	Test	Amazonas							0.2										Var. CCN51	Tuesta [235]	2022
Cacao (Theobroma cacao) E	Test	Amazonas							0.23										Common	Tuesta [235]	2022
Pill, stem, and bark
Cacao (Theobroma cacao) E	Peel	Amazonas							0.42										Var. CCN51	Tuesta [235]	2022
Cacao (Theobroma cacao) E	Peel	Amazonas							0.22										Common	Tuesta [235]	2022
Cacao (Theobroma cacao) E	Peel	San Martín							1.161											Dionisio [253]	2020
Cacao (Theobroma cacao) E	Peel	San Martín							1.253	0				0.0952						Fonseca [265]	2021
Cacao (Theobroma cacao) E	Peel	Ucayali							0.6										Organic system	Tuesta [282]	2019
Cacao (Theobroma cacao) E	Peel	Ucayali							0.86										Chemical system	Tuesta [282]	2019
Cacao (Theobroma cacao) E	Peel	Ucayali							0.39										Traditional system	Tuesta [282]	2019
Cacao (Theobroma cacao) E	Pill	Huánuco							2.04										Organic. Genotype CCN51	Cárdenas [229]	2013
Cacao (Theobroma cacao) E	Pill	Huánuco							0.77										Genotype CCN51	Tantalean [230]	2017
Cacao (Theobroma cacao) E	Pill	San Martín							0.75										Genotype CCN51	Tantalean [230]	2017
Cacao (Theobroma cacao) E	Pill	Huánuco							1.28										Non-fermented seed. Genotype CCN51	Falcón [278]	2019
Celery (Apium graveolens) E	Stem	Amazonas				0.31			0	0.03				0.17						Grandez [240]	2021
Caimito (Pouteria caimito) M	Stem	Amazonas							0.197											Oc Llatance, et al. [100]	2018
Nettle (Malvaviscus sp.) M	Stem	Amazonas							0.07											Oc Llatance, et al. [100]	2018
Chope (Vochysia sp.) M	Stem	Amazonas							0											Oc Llatance, et al. [100]	2018
Panama hat palm (Carludovica palmata) M	Stem	Amazonas							0.093											Oc Llatance, et al. [100]	2018
Yarina (Attalea sp.) E	Stem	Amazonas							0.38											Oc Llatance, et al. [100]	2018
Cacao (Theobroma cacao) M	Stem	Amazonas							0.747										Agricultural soil	Oc Llatance, et al. [100]	2018
Giant reed (Arundo donax) M	Stem	La Libertad							1.30367					3.94083					In alluvial sediments. Contaminated watershed	Escobar [200]	2019
Umbrella sedge (Cyperus alternifolius) M	Stem	La Libertad							0.51587					3.03417					In alluvial sediments. Contaminated watershed	Escobar [200]	2019
Christmas candlestick (Leonotis nepetifolia) M	Stem	La Libertad							0.83275					3.2125					In alluvial sediments. Contaminated watershed	Escobar [200]	2019
Glasswort (Sarcocornia fruticosa) E	Stem	Lima	0.03		2.75	1.59			0.59	1.01		1.4		8.22	0.59					Rosas [97]	2021
Chocho (Lupinus mutabilis) M	Stem	La Libertad							50.4											Delgado [81]	2014
Espino (Acacia macracantha) M	Stem	La Libertad												0						Blaz [244]	2015
Senecio (Senecio collinus) M	Stem	Pasco							4.25					1.89					Non-disturbed soil	Gómez [209]	2019
Pennywort (Hydrocotyle vulgaris) M	Stem	Pasco							0.33					2.73					Natural water	Tapia [210]	2020
Tarwi (Lupinus mutabilis) M	Stem	Arequipa				31.4686			0.5577					6.3523					Non-tailing treatment (agriculotural soil with distilled water)	Chuquitoma [211]	2022
Sunflower (Helianthus annuus) E	Stem	La Libertad												0.99						García [214]	2009
Ichu (Stipa Ichu) M	Stem	Pasco							0.11					4.75					Non-disturbed soil	Ricapa [144]	2020
Corn (Zea mays) M	Stem	Lima							1.86					4.33					Genotype INIA611	Flores [85]	2019
Bushviolet (Browallia americana) M	Stem	Huánuco							1.55										Male (agricultural soil)	Fernández [82]	2019
Pastureweed (Cyathula prostrata) M	Stem	Huánuco							10.1										Male (agricultural soil)	Fernández [82]	2019
Siso menudo (Philoglossa mimuloides) M	Stem	Huánuco							1.98										Male (agricultural soil)	Fernández [82]	2019
Spreading dayflower (Commelina diffusa) M	Stem	Huánuco							1.48										Male (agricultural soil)	Fernández [82]	2019
Marmaquilla (Ageratina azangaroensis) E	Stem	Huánuco							4.35										Male (agricultural soil)	Fernández [82]	2019
False buttonweed (Borreria prostrata) M	Stem	Huánuco							1										Male (agricultural soil)	Fernández [82]	2019
Wild poinsettia (Euphorbia heterophylla) M	Stem	Huánuco							3.43										Male (agricultural soil)	Fernández [82]	2019
Tarwi (Lupinus mutabilis) M	Stem	Arequipa				34.3016			0.6253					6.8823					Non-tailing treatment (agriculotural soil with distilled water)	Chuquitoma [211]	2022
Chuchuhuasi (Maytenus macrocarpa) M	Bark	Loreto							0.132	4.583				0.398						Apaclla and Pezo [220]	2015
Clavo huasca (Tynanthus panurensis) M	Bark	Loreto							0.567											García and Uribe [222]	2015
Huacapurana (Campsiandra angustifolia) M	Bark	Loreto							0.54	17.71				17.43						Medina and Taminche [94]	2015
Chuchuhuasi (Maytenus macrocarpa) M	Bark	Loreto	0.098			1.17			0					0						Sosa [283]	2017
Icoja (Unonopsis floribunda) M	Bark	Loreto	0.053			5.23			0					0						Sosa [283]	2017
Fierro caspi (Minquartia guianensis) M	Bark	Loreto	0.043			3.82			0					0						Sosa [283]	2017
Cumaceba (Swartzia polyphylla) M	Bark	Loreto	0.098			3.61			0					0						Sosa [283]	2017
Clavo huasca (Tynanthus panurensis) M	Bark	Loreto	0.027			1.27			0.394					0.67						Sosa [283]	2017
Tahuari (Tabebuia incana) M	Bark	Loreto	0.035			2.24			0					0						Sosa [283]	2017
Huacapurana (Campsiandra angustifolia) M	Bark	Loreto	0.036			4.29			0.043					0						Sosa [283]	2017
Suggarcane (Saccharum officinarum) M	Bark	Loreto	0.033			5.12			0.306					2.25						Sosa [283]	2017
Abuta (Abuta rufescens) M	Bark	Loreto	0.016			2.97			0.128					0.15						Sosa [283]	2017
Achunisanango (Anomospermun sp.) M	Bark	Loreto	0.036			1.07			0.811					0						Sosa [283]	2017
Tamamuri (Brosimun potabile) M	Bark	Loreto	0.438			8.19			0					0						Sosa [283]	2017
Murure (Brosimum alicastrum) M	Bark	Loreto	0.008			2.33			0					0						Sosa [283]	2017
Remocaspi (Aspidosperma rigidum) M	Bark	Loreto	7.06			18.3			5.31	6.9				7.38					Acid soils	Olortegui [93]	2021
Guaba (Inga edulis) M	Bark	Loreto	0.015						0.046					0.143						Contreras [232]	2022
Yuca (Manihot esculenta) M	Stem	Madre de Dios	0			0.199			0					0.279						Soto-Benavente et al. [61]	2020
Banana (Musa paradisiaca) M	Stem	Madre de Dios	0.177			0			0.003					0.04						Soto-Benavente et al. [61]	2020
Cacao (Theobroma cacao) M	Stem	Amazonas							0.49										Var. CCN51 (cacao plantations)	Tuesta [235]	2022
Cacao (Theobroma cacao) M	Stem	Amazonas							0.3										Common	Tuesta [235]	2022
Cortadera (Cortaderia rudiuscula) M	Stem	La Libertad							0.011					0.1723					Control treatment	Anticona and Arteaga [284]	2018
Cortadera (Cortaderia rudiuscula) M	Stem	La Libertad												0.052						Carrera and Abanto [250]	2018
Acorn squash (Cucurbita pepo) M	Stem	Junín				0			0.04					0						Rosales [237]	2020
Berro (Nasturtium officinale) M	Stem	Huancavelca							0											Ñahui [234]	2021
Common horsetail (Equisetum arvense) M	Stem	Huancavelca												0						Ñahui [234]	2021
Romaza (Rumex crispus) M	Stem	Huancavelca								0										Ñahui [234]	2021
Processed
Quinoa extract (Chenopodium quinoa) E	Pop grain	Puno												0.0367						Parillo [285]	2021
Quinoa extract (Chenopodium quinoa) E	Pop grain	Puno												0.0697						Parillo [285]	2021
Quinoa extract (Chenopodium quinoa) E	Pop grain	Puno												0.165						Parillo [285]	2021
Quinoa extract (Chenopodium quinoa) E	Pop grain	Arequipa	0.0035			0.05			0.04		0.01			0.55						Roman-Ochoa et al. [64]	2021
Corn (Zea mays) E	Pop grain	Arequipa	0.0035			0.01			0		0.01			0.75						Roman-Ochoa et al. [64]	2021
Rice (Oryza savita) E	Pop grain	Arequipa	0.0027			0.05			0.01		0.03			5.08						Roman-Ochoa et al. [64]	2021
Cacao (Theobroma cacao) E	Seed's cotyledon (fermented)	Huánuco							0.74										Clon CCN-51	Falcón [278]	2019
Cacao (Theobroma cacao) E	Seed's cotyledon (fermented)	Huánuco							0.66										Clon CCN-51	Falcón [278]	2019
Cacao (Theobroma cacao) E	Seed's cotyledon (fermented)	Huánuco							0.54										Clon CCN-51	Falcón [278]	2019
Cacao (Theobroma cacao) E	Seed's pill (fermented)	Huánuco							3.65										Clon CCN-51	Falcón [278]	2019
Cacao (Theobroma cacao) E	Seed's pill (fermented)	Huánuco							2.36										Clon CCN-51	Falcón [278]	2019
Cacao (Theobroma cacao) E	Seed's pill (fermented)	Huánuco							3.47										Clon CCN-51	Falcón [278]	2019
Cacao (Theobroma cacao) E	Seed (fermented)	Huánuco							0.18					3.28					Var. criollo	Tolentino [275]	2018
Cacao (Theobroma cacao) E	Seed (fermented)	Huánuco							0.16					3.54					Var. común	Tolentino [275]	2018
Cacao (Theobroma cacao) E	Seed (fermented)	Huánuco							0.2					3.34					Var. CCN-51	Tolentino [275]	2018
Cacao (Theobroma cacao) E	Seed (fermented)	Huánuco							0.09					2.48					Var. FC2	Tolentino [275]	2018
Cacao (Theobroma cacao) E	Seed (fermented)	Huánuco							0.11					2.81					Var. FC3	Tolentino [275]	2018
Cacao (Theobroma cacao) E	Seed (fermented)	Huánuco							0.06					2.4					Var. FC4	Tolentino [275]	2018
Cacao (Theobroma cacao) E	Seed (fermented)	Huánuco							0.15					2.57					Var. VPA-1	Tolentino [275]	2018
Cacao (Theobroma cacao) E	Seed (fermented)	Huánuco							0.13					2.54					Var. VPA-2	Tolentino [275]	2018
Cacao (Theobroma cacao) E	Seed (fermented)	Huánuco							0.14					3.56					Var. ICS-95	Tolentino [275]	2018
Cacao (Theobroma cacao) E	Seed (fermented)	Huánuco							0.06					3.07					Var. criollo morado	Tolentino [275]	2018
Cacao (Theobroma cacao) E	Chocolate licor	San Martín							0.213											Santander and Mendieta [203]	2019
Cacao Criollo Orgánico (Theobroma cacao L.) E	Chocolate licor	Cajamarca							0.55											López and Incio [270]	2022
Cacao (Theobroma cacao) E	Chocolate licor	Huánuco							0.1					6.22						Del Aguila [274]	2017
Cacao (Theobroma cacao) E	Chocolate licor	Junín							0.04					7.45						Del Aguila [274]	2017
Cacao (Theobroma cacao) E	Chocolate licor	Ucayali							0.11					6.4						Del Aguila [274]	2017
Cacao (Theobroma cacao) E	Chocolate tablets (70% cacao)	San Martín							0.625											Santander and Mendieta [203]	2019
Cacao (Theobroma cacao) E	Chocolate bar (70 - 100% cacao)	Ucayali							0.21					0.435						Romero [286]	2021
Cacao (Theobroma cacao) E	Chocolate paste	Huánuco							0.15					1.58					Var. criollo	Tolentino [275]	2018
Cacao (Theobroma cacao) E	Chocolate paste	Huánuco							0.13					2.27					Var. común	Tolentino [275]	2018
Cacao (Theobroma cacao) E	Chocolate paste	Huánuco							0.18					1.84					Var. CCN-51	Tolentino [275]	2018
Cacao (Theobroma cacao) E	Chocolate paste	Huánuco							0.08					1.42					Var. FC2	Tolentino [275]	2018
Cacao (Theobroma cacao) E	Chocolate paste	Huánuco							0.06					1.35					Var. FC3	Tolentino [275]	2018
Cacao (Theobroma cacao) E	Chocolate paste	Huánuco							0.06					2.01					Var. FC4	Tolentino [275]	2018
Cacao (Theobroma cacao) E	Chocolate paste	Huánuco							0.14					0.66					Var. VPA-1	Tolentino [275]	2018
Cacao (Theobroma cacao) E	Chocolate paste	Huánuco							0.09					0.35					Var. VPA-2	Tolentino [275]	2018
Cacao (Theobroma cacao) E	Chocolate paste	Huánuco							0.13					1.38					Var. ICS-95	Tolentino [275]	2018
Cacao (Theobroma cacao) E	Chocolate paste	Huánuco							0.08					1.16					Var. criollo morado	Tolentino [275]	2018
Coffee (Coffea arabica) E	Essence	Cajamarca							0											Pintado and Mego [267]	2019
Maca flour (Lepidium meyenii) E	Flour	Junín	0											0.00019					ug/g converted to g/kg	Solano [287]	2022
Marijuana (Cannabis sativa) M	Oil	Arequipa	0			0.066			0.012					1.785						Revilla and Cano [288]	2021
Suggarcain juice (Saccharum officinarum) E	Juice	Lima	0.45839											1.35472						Huanri [98]	2014
Orange juice E	Juice	Lima							0.0159					0.5903					Informal market	Terrazos [289]	2022
Botteled water	Water	Lima				0.0018			0.001										Ppb converted to ppm	León and Ramos [290]	2014
Quinoa juice E	Drink	Lima				0.0875			0.1189											Hualán and Magallanes [291]	2019
Rice (Oryza savita) E	Grain	Lima							0.362					0.852					Huamantanga market	Flores and Novoa [292]	2022
Tea (Camellia sinensis) E	Teabag	Lima	0.016			0.13			0.31			5.66		12.58					mg/g (=ppm)	Huguet [96]	2014
Camomille (Matricaria chamomilla L.) E	Teabag	Lima	0.014			0.14			0.54			6.24		15.66					mg/g (=ppm)	Huguet [96]	2014
Anis (Pimpinella anisum) M	Teabag	Lima	0.013			0.08			0.57			2.74		22.15					mg/g (=ppm)	Huguet [96]	2014
Lemongrass (Cymbopogon citratus) E	Teabag	Lima	0.012			0.11			0.61			4.65		19.55					mg/g (=ppm)	Huguet [96]	2014
Green tea (Camellia sinensis) E	Teabag	Lima	0.015			0.06			0.41			5.87		13.87					mg/g (=ppm)	Huguet [96]	2014
Black tea and cinnamon (Cinnamomum verum) E	Teabag	Lima	0.009			0.16			0.59			6.99		16.35					mg/g (=ppm)	Huguet [96]	2014
Lemongrass (Cymbopogon citratus) and Camomille (Matricaria chamomilla L.) E	Teabag	Lima	0.008			0.11			0.62			1.98		14.75					mg/g (=ppm)	Huguet [96]	2014
Black tea E	Teabag	Lima	0.009			0.05			0.38			6.22		14.25					mg/g (=ppm)	Huguet [96]	2014
Lemon pill E	Teabag	Lima	0.003			0.07			0.29			5.73		6.87					mg/g (=ppm)	Huguet [96]	2014
Camomille (Matricaria chamomilla) E	Teabag	Lima	0.003			0.05			0.19			5.26		5.77					mg/g (=ppm)	Huguet [96]	2014
Camomille (Matricaria chamomilla), anis (Pimpinella anisum), malva (Malva silvestris), cinnamon (Cinnamomum verum) E	Teabag	Lima	0.003			0.08			0.17			3.59		6.98					mg/g (=ppm)	Huguet [96]	2014
Camomille (Matricaria chamomilla), anis (Pimpinella anisum), cedron (Aloysia citrodora) E	Teabag	Lima	0.003			0.09			0.21			3.87		4.59					mg/g (=ppm)	Huguet [96]	2014
Camomille (Matricaria chamomilla), anis (Pimpinella anisum), borraja (Borago officinalis) E	Teabag	Lima	0.003			0.09			0.22			4.28		6.01					mg/g (=ppm)	Huguet [96]	2014
Rice (Oryza sativa) E	Grain (polished)	Lima	0.352																	Allende and Vidarte [293]	2021
Dandelion (Taraxacum officinale) E	Leave infusion	Cusco							0.000113	0.00156				0.001038					Converted from ug/L to ppm	Callo [252]	2022
Dandelion (Taraxacum officinale) E	Aereal portion (boiled)	Cusco							0.000317	0.002506				0.001932					Converted from ug/L to ppm	Callo [252]	2022
Dandelion (Taraxacum officinale) E	Root infusion	Cusco							5.7e-05	0.00179				0.000352					Converted from ug/L to ppm	Callo [252]	2022
Dandelion (Taraxacum officinale) E	Root (boiled)	Cusco							8.7e-05	0.002506				0.000602					Converted from ug/L to ppm	Callo [252]	2022
Pilli Pilli (Hypochaeris meyeniana) E	Leave infusion	Cusco							0.000107	0.00146				0.000585					Converted from ug/L to ppm	Callo [252]	2022
Pilli Pilli (Hypochaeris meyeniana) E	Aereal portion (boiled)	Cusco							0.000117	0.001593				0.000682					Converted from ug/L to ppm	Callo [252]	2022
Pilli Pilli (Hypochaeris meyeniana) E	Root infusion	Cusco							0.000137	0.00146				0.000342					Converted from ug/L to ppm	Callo [252]	2022
Pilli Pilli (Hypochaeris meyeniana) E	Root (boiled)	Cusco							5e-05	0.002126				0.00042					Converted from ug/L to ppm	Callo [252]	2022
Puna llantén (Plantago australis subsp hirtella) E	Leave infusion	Cusco							7e-05	0.00194				0.000808					Converted from ug/L to ppm	Callo [252]	2022
Puna llantén (Plantago australis subsp hirtella) E	Aereal portion (boiled)	Cusco							0.000307	0.00204				0.001112					Converted from ug/L to ppm	Callo [252]	2022
Puna llantén (Plantago australis subsp hirtella) E	Root infusion	Cusco							4.7e-05	0.001556				0.000285					Converted from ug/L to ppm	Callo [252]	2022
Puna llantén (Plantago australis subsp hirtella) E	Root (boiled)	Cusco							0.000187	0.00244				0.001132					Converted from ug/L to ppm	Callo [252]	2022
Coffee (Coffea arabica) E	Seed (toasted)	Cajamarca							0.264											Mundaca and Huamán [281]	2021
Coffee (Coffea arabica) E	Seed (toasted and grounded)	Cajamarca							0.168											Mundaca and Huamán [281]	2021
Coffee (Coffea arabica) E	Coffee drink	Cajamarca							0											Mundaca and Huamán [281]	2021
Mixtures
Corn (Zea mays) M	Stems and leaves	Arequipa	0.02	0	0	0	2	0	0.29	0.2	0	0	0	0.08	0	0	0	0		OEFA [90]	2017
Alfalfa (Medicago sativa) E	Stems and leaves	Arequipa							0.06	0.82				-	-	-	-			Núñez [294]	2018
Spearmint (Mentha spicata) E	Stems and leaves	Arequipa	0.019			0.113			0.019	0.057				0.189					Edible part	Quispe [63]	2019
Cilantro (Coriandrum sativum) E	Stems and leaves	Arequipa	0.011			0.067			0.049	0.114				0.067					Edible part	Quispe [63]	2019
Cilantro (Coriandrum sativum) E	Stems and leaves	Arequipa	0.007			0.067			0.049	0.114				0.067					Agricultural soil	Quispe et al. [242]	2021
Peppermint (Mentha sativa) E	Stems and leaves	Arequipa	0.019			0.113			0.019	0.057				0.189						Quispe et al. [242]	2021
Peppermint (Mentha sativa) E	Stems and leaves	Arequipa	0.014			0.57			0.013	0.19		0.55		0.21		0.015				Paredes et al. [295]	2018
Matico (Buddleja globosa) M	Stems and leaves	Arequipa	0.024			0.58			0.021	0.51		0.59		0.6		0.01				Paredes et al. [295]	2018
Oat (Avena sativa) M	Stems and leaves	Arequipa	0.016			2.24			0.016	0.18		0.32		0.12		0.003				Paredes et al. [295]	2018
Camomile (Chamaemelum nobile) M	Stems and leaves	Arequipa	0.016			1.71			0.46	1.01		0.4		0.2		0.05			Arequipa market	Paredes et al. [295]	2018
Eucalyptus (Eucalyptus globulus) M	Stems and leaves	Arequipa	0.05			0.9			0.024	0.2		5.3		0.28		0.01				Paredes et al. [295]	2018
Oregano (Origanum vulgare) E	Stems and leaves	Arequipa	0.012			0.28			0.101	0.21		3.7		0.3		0.011			Arequipa market	Paredes et al. [295]	2018
Alfalfa (Medicago sativa) E	Stems and leaves	Arequipa	0.011			0.65			0.012	0.07		1.66		0.16		0.004				Paredes et al. [295]	2018
Spearmint (Mentha spicata) E	Stems and leaves	Arequipa	0.02			0.51			0.023	0.16		0.71		0.3		0.004			Arequipa market	Paredes et al. [295]	2018
Italian ryegrass (Lolium multiflorum) and White clover (Trifolium repens) M	Whole plant	Junín												11.45					Grazing soils	Quijada [296]	2021
Pineapple (Ananas comosus) M	Aereal portion	Cajamarca												0						Pereyra [243]	2019
Senecio (Senecio rufescens) M	Aereal portion	Lima				11.41			8.85					64.81					Non-disturbed soils in Lima (Laguna Ticticocha)	Dextre [87]	2017
Hierba estrella (Paranephelius uniflorus) M	Whole plant	Junín							0.04					0.36						Pérez [142]	2015
Roseta (Hypachoeris meyeniana) E	Whole plant	Junín							0.14					1.11						Pérez [142]	2015
Yellow flower (Senecio collinus) M	Whole plant	Junín							0.017					0.12						Pérez [142]	2015
Garbancillo (Astragalus garbancillo) M	Whole plant	Junín							0.02					0.05						Pérez [142]	2015
Yana llachu (Elodea potamogeton) M	Whole plant	Puno	0.691135	16.0984		0.165339	2.77475		0.004762	0.042352		0.055129		0.148143					Dry season	Carpio [76]	2016
Yana llachu (Elodea potamogeton) M	Whole plant	Puno	0.522472	9.42034		0.32347	2.09628		0.007701	0.024469		0.085844		0.158109					Wet season	Carpio [76]	2016
Hinojo llachu (Mysiophyllum elatinoides) M	Whole plant	Puno	0.516196	9.00829		0.071277	2.61332		0.004313	0.06608		0.045772		0.06614					Dry season	Carpio [76]	2016
Hinojo llachu (Mysiophyllum elatinoides) M	Whole plant	Puno	0.798132	9.83631		0.237452	1.7015		0.005596	0.016593		0.026077		0.076124					Wet season	Carpio [76]	2016
Aztec clover (Trifolium amabile) M, Calamagrostis sp., Distichia sp., and Senecio sp.	Aereal portion	Puno	0.10264			0.04933			0.04254					0						Huanqui [297]	2018
Alfalfa (Medicago sativa) M	Aereal portion	Junín												0.51					Forage	Carrillo [298]	2013
Cabbage (Brassica oleracea) E	Aereal portion	La Libertad							0					0					Var. Capitata	Guerrero and Hoyos [103]	2014
Radish (Raphanus sativus) E	Aereal portion	La Libertad							0					0						Guerrero and Hoyos [103]	2014
Cat grass (Dactylis glomerata) and White clover (Trifolium repens) M	Aereal portion	Junín							0.586										Cultivated grasses. Dry season. Community farm	Gómez [246]	2021
Cat grass (Dactylis glomerata) and White clover (Trifolium repens) M	Aereal portion	Junín							0.629										Cultivated grasses. Wet season. Community farm	Gómez [246]	2021
Chillihua (Festuca dolichophylla), Dissanthelium calycinum, Sergua (Carex ecuadorica), Psiñe de burro (Hypochaeris taraxacoides), and Pasto de oveja (Alchemilla pinnata) M	Aereal portion	Junín							0.541										Natural grass. Dry season. Community farm	Gómez [246]	2021
Chillihua (Festuca dolichophylla), Dissanthelium calycinum, Sergua (Carex ecuadorica), Psiñe de burro (Hypochaeris taraxacoides), and Pasto de oveja (Alchemilla pinnata) M	Aereal portion	Junín							0.579										Natural grass. Wet season. Community farm	Gómez [246]	2021
Italian ryegrass (Lolium multiflorum) M and White clover (Trifolium repens) M	Aereal portion	Junín							7.12											Huacho [247]	2022
Spike trisetum (Trisetum spicatum) E	Aereal portion	Pasco							0.00265					0.02975						Huaranga [143]	2019
Khela (Senecio rufescens) M	Aereal portion	Pasco							0.00228					0.0154						Huaranga [143]	2019
Arctic rush (Juncus arcticus) M	Whole plant	Ancash				50.06								10.97					Uquián wetland	Morales [92]	2019
Corn (Zea mays) E	Plant tissue	Cusco	0.15						1	0.5				0.15					Within the Rumicruz landfill's influence area	Choquenaira and Estofanero [299]	2021
Manayupa (Desmodium molliculum) M	Whole plant	La Libertad				2.805			5.24					41.026						Arana and Quispe [300]	2014
Chamomile (Matricaria chamomilla) M	Whole plant	La Libertad				0.596			6.817					13.456						Arana and Quispe [300]	2014
Manayupa (Desmodium molliculum) M	Whole plant	La Libertad				0.458			2.64					6.043						Arana and Quispe [300]	2014
Chamomile (Matricaria chamomilla) M	Whole plant	La Libertad				0.288			2.951					0.059						Arana and Quispe [300]	2014
Corn (Zea mays) M	Whole plant	Lima							0.0365					0.084					Genotype PMX5	Ostolaza [226]	2020
Bulbous canary-grass (Phalaris aquatica) M	Aereal portion	Junín												1.3						Huamán [301]	2019
Cacao (Theobroma cacao) M	Stems and leaves	Huánuco							2.29										Genotype CCN51	Tantalean [230]	2017
Cacao (Theobroma cacao) M	Stems and leaves	San Martín							2.97										Genotype CCN51	Tantalean [230]	2017
Dandelion (Taraxacum officinale) M	Aereal portion	Cusco							0.02	4.793				2.187						Callo [252]	2022
Pilli Pilli (Hypochaeris meyeniana) M	Aereal portion	Cusco							0.016	0.04				0.07						Callo [252]	2022
Puna llantén (Plantago australis subsp hirtella) M	Aereal portion	Cusco							0.015	1.15				0.133						Callo [252]	2022
Cacao (Theobroma cacao) M	Whole plant	Amazonas							3.54										Var. CCN51	Tuesta [235]	2022
Cacao (Theobroma cacao) M	Whole plant	Amazonas							2.51										Common	Tuesta [235]	2022
Clavel del aire (Tillandsia capillaris) M	Whole plant	Junín			2.47	7.93			0.42			3.79		18.21					Metropolitan area	Cedrón and Velásquez [302]	2022
Clavel del aire (Tillandsia capillaris) M	Whole plant	Huancavelca			0.32	2.74			0.09			1.99		3.47					Metropolitan area	Cedrón and Velásquez [302]	2022
Others
Asparagus (Asparagus officinalis) E	Sprouts	Ica							0.21										Genotype UC57-F1 (small farmers land)	Garcilazo [303]	2021
Asparagus (Asparagus officinalis) E	Sprouts	Ica							4.41										Variedad UC-157 F1	Rodríguez [84]	2022
Figs (Ficus nitida) M	Parenchymal tissue	Lima												54.97					Urban area	Cobeña [88]	2014
Marijuana (Cannabis sativa) M	Infloresence	Arequipa	0.045			0.354			0.135					6.146						Revilla and Cano [288]	2021
Marijuana (Cannabis sativa) M	Infloresence	Moquegua	0.045			0.277			0.116					6.94						Revilla and Cano [288]	2021
Marijuana (Cannabis sativa) M	Infloresence	Lima	0.037			0.049			0.033					3.244						Revilla and Cano [288]	2021
