# Supplementary material for: Heavy Metal Bioaccumulation in Peruvian Food and Medicinal Products
Source: Foods. 2024 Feb 29;13(5):762. doi: 10.3390/foods13050762 (PMC10931273; doi:10.3390/foods13050762)
Supplement: Supplementary file 1 [file foods-13-00762-s001.zip › Table SI 5b.xlsx]

## Sheet: Sheet1
Table S5. Maximum metal concentrations of each fish-based edible/medicinal product found in Peruvian studies.
E = Edible
M = Medicinal
Black = Below MPLs (WHO)
Red = Above MPLs (WHO)
Blue = Not regulated by WHO
			Concentration (mg/Kg)
Species	Material	Region	Hg	CH3-Hg	Al	Sb	As	Ba	Be	Cd	Cr	Sn	Ni	Ag	Pb	Se	Tl	Ti	U	Comments	Source	Year
Muscular tissue
Eastern Pacific bonito (Sarda chiliensis) E	Muscular tissue	Arequipa	0.047																		Llerena and Mendiola [304]	2019
Chilean jack mackerel (Trachurus murphyi) E	Muscular tissue	Arequipa	0.043																		Llerena and Mendiola [304]	2019
Chilean silverside (Odontesthes regia) E	Muscular tissue	Arequipa	0.014																		Llerena and Mendiola [304]	2019
Julilla (Paradon buckleyi) E	Muscular tissue	Huánuco								1.62					0						Rosales et al. [120]	2020
Carachama (Chaetostoma sp.) E	Muscular tissue	Huánuco								1.59					5.09						Rosales et al. [120]	2020
Black prochilodus (Prochilodus nigricans) E	Muscular tissue	Huánuco								0.73					0.61						Rosales et al. [120]	2020
Rainbow trout (Oncorhynchus mykiss) E	Muscular tissue	Ayacucho	0				0.52			0	0		0		0	0.33					De La Cruz [305]	2022
Flathead grey mullet (Mugil cephalus) E	Muscular tissue	Tacna	0.875																		Ninaja [123]	2020
Delicious drum (Sciaena deliciosa) E	Muscular tissue	Tacna	0.75																		Ninaja [123]	2020
Eastern Pacific bonito (Sarda chiliensis) E	Muscular tissue	Tacna	1.264																		Ninaja [123]	2020
Delicious drum (Sciaena deliciosa) E	Muscular tissue	Tacna	0.889																		Ninaja [123]	2020
Atlantic mackerel (Scomber scombrus) E	Muscular tissue	Tacna	0.639																		Ninaja [123]	2020
Rainbow trout (Oncorhynchus mykiss) E	Muscular tissue	Puno	0							0					0.051						Chui et al. [306]	2021
Rainbow trout (Oncorhynchus mykiss) E	Muscular tissue	Áncash	0.434							0.002					1.826						Bertolotti and Moccetti [307]	2018
Brown trout (Salmo trutta) E	Muscular tissue	Cusco								0.0251					0.099						Cárdenas [308]	2021
Rainbow trout (Oncorhynchus mykiss) E	Muscular tissue	Apurímac								0					0						Patiño [119]	2019
Rainbow trout (Oncorhynchus mykiss) E	Muscular tissue	Junín													10.45						Chanamé [117]	2009
Black prochilodus (Prochilodus nigricans) E	Muscular tissue	Ucayali		0.01																White sample	Panduro et al. [309]	2019
Amazon sailfin catfish (Pterygoplichthys pardalis) E	Muscular tissue	Ucayali		0.06																	Panduro et al. [309]	2019
Black prochilodus (Prochilodus nigricans) E	Muscular tissue	Ucayali		0.09																	Panduro et al. [309]	2019
Spotted Tiger Shovelnose Catfish (Pseudoplatystoma punctifer) E	Muscular tissue	Ucayali		0.11																	Panduro et al. [309]	2019
Vulture Catfish (Calophysus macropterus) E	Muscular tissue	Ucayali		0.19																	Panduro et al. [309]	2019
Amazon Sailfin Catfish (Pterygoplichthys pardalis) E	Muscular tissue	Ucayali	0.06																		Rengifo and Barreto [310]	2017
Black prochilodus (Prochilodus nigricans) E	Muscular tissue	Ucayali	0.09																		Rengifo and Barreto [310]	2017
Spotted tiger shovelnose catfish (Pseudoplatystoma punctifer) E	Muscular tissue	Ucayali	0.11																		Rengifo and Barreto [310]	2017
Vulture Catfish (Calophysus macropterus) E	Muscular tissue	Ucayali	0.19																		Rengifo and Barreto [310]	2017
Flathead grey mullet (Mugil cephalus) E	Muscular tissue	Tumbes	0.0144				0.0414			0.0681					0.63							2015
Bigscale sleeper (Gobiomorus maculatus) E	Muscular tissue	Tumbes	0.0684				0.02			0.12					0.6125						Espinoza and Falero [311]	2015
Gold saum (Andinoacara rivulatus) E	Muscular tissue	Tumbes	0.0311				0.03			0.0842					0.6058						Espinoza and Falero [311]	2015
Sabalo (Brycon amazonicus) E	Muscular tissue	Tumbes	0.012				0.0567			0.0842					0.6						Espinoza and Falero [311]	2015
Yellowfin mojarra (Gerres cinereus) E	Muscular tissue	Tumbes	0.1107				0.0133			0.2367					0.5875						Espinoza and Falero [311]	2015
Pacific fat sleeper (Dormitator latifrons) E	Muscular tissue	Tumbes	0.015				0.03			0.12					0.54						Espinoza and Falero [311]	2015
Dica (Pseudocurimata troschelii) E	Muscular tissue	Tumbes	0.0696				0.02			0.077					0.51						Espinoza and Falero [311]	2015
Smooth hammerhead (Sphyrna zygaena) E	Muscular tissue	Tumbes	0.85																		Gonzalez-Pestana et al. [312]	2017
Smooth hammerhead (Sphyrna zygaena) E	Muscular tissue	Lambayeque	0.42																		Gonzalez-Pestana et al. [312]	2017
Rainbow trout (Oncorhynchus mykiss) E	Muscular tissue	Lima	0.0001				0.00051								0.51						Rivas [313]	2018
Tiger chovelnose catfish (Pseudoplatystoma tigrinum) E	Muscular tissue	Ayacucho	0												0						Navarro [314]	2015
Black prochilodus (Prochilodus nigricans) E	Muscular tissue	Ucayali	0							0					0						Instituto Tecnológico Pesquero del Perú [315]	2009
Black prochilodus (Prochilodus nigricans) E	Muscular tissue	Loreto	0.138							0.1					0.13						Instituto Tecnológico Pesquero del Perú [315]	2009
Black prochilodus (Prochilodus nigricans) E	Muscular tissue	Madre de Dios	0.03914							0.15					0.13						Instituto Tecnológico Pesquero del Perú [315]	2009
Lisa (Schizodon fasciatus) E	Muscular tissue	Ucayali	0							0					0						Instituto Tecnológico Pesquero del Perú [315]	2009
Lisa (Schizodon fasciatus) E	Muscular tissue	Loreto	0.143							0.02					0.11						Instituto Tecnológico Pesquero del Perú [315]	2009
Llambina (Potamorhina altamazonica) E	Muscular tissue	Ucayali	0							0					0						Instituto Tecnológico Pesquero del Perú [315]	2009
Llambina (Potamorhina altamazonica) E	Muscular tissue	Loreto	0							0					0						Instituto Tecnológico Pesquero del Perú [315]	2009
Llambina (Potamorhina altamazonica) E	Muscular tissue	Madre de Dios	0.104							0.01					0						Instituto Tecnológico Pesquero del Perú [315]	2009
Sardina (Triportheus angulatus) E	Muscular tissue	Ucayali	0							0					0						Instituto Tecnológico Pesquero del Perú [315]	2009
Sardina (Triportheus angulatus) E	Muscular tissue	Loreto	0.125							0.02					0.12						Instituto Tecnológico Pesquero del Perú [315]	2009
Doncella (Pseudoplatystoma fasciatum) E	Muscular tissue	Loreto	0.2505							0.01					0.13						Instituto Tecnológico Pesquero del Perú [315]	2009
Doncella (Pseudoplatystoma fasciatum) E	Muscular tissue	Madre de Dios	0.676							0.01					0.11						Instituto Tecnológico Pesquero del Perú [315]	2009
Laulao catfish (Brachyplatystoma vaillantii) E	Muscular tissue	Loreto	0.5811							0.02					0.21						Instituto Tecnológico Pesquero del Perú [315]	2009
Flatwhiskered catfish (Pinirampus pirinampu) E	Muscular tissue	Loreto	0.733							0.008					0.13						Instituto Tecnológico Pesquero del Perú [315]	2009
Flatwhiskered catfish (Pinirampus pirinampu) E	Muscular tissue	Madre de Dios	0.7442							0.04					0.12						Instituto Tecnológico Pesquero del Perú [315]	2009
Ractacara (Psectrogaster amazonica) E	Muscular tissue	Madre de Dios	0.1137							0.008					0.22						Instituto Tecnológico Pesquero del Perú [315]	2009
Yulilla (Anodus elongatus) E	Muscular tissue	Madre de Dios	0.188							0.014					0.13						Instituto Tecnológico Pesquero del Perú [315]	2009
Rainbow trout (Oncorhynchus mykiss) E	Muscular tissue	Puno	0.04376							0.01435					0.613						Rojas [316]	2022
Brown trout (Salmo trutta) E	Muscular tissue	Puno	0.0082												0.052						Foraquita [317]	2018
Chilean silverside (Odontesthes regia) E	Muscular tissue	Puno	0.0082												0.052						Foraquita [317]	2018
Black prochilodus (Prochilodus nigricans) E	Muscular tissue	Huánuco								0.73					0.61						Rosales [115]	2012
Carachamas (Characidium caucanum) E	Muscular tissue	Huánuco								1.59					5.09						Rosales [115]	2012
Royal pleco (Panaque nigrolineatus) E	Muscular tissue	Huánuco								1.62					0						Rosales [115]	2012
Eastern Pacific bonito (Sarda chilensis) E	Muscular tissue	Lima	0.3999																		Nifla [318]	2017
Pacific chub mackerel (Scomber japonicus peruanus) E	Muscular tissue	Lima	0.3365																		Nifla [318]	2017
Blue jack mackerel (Trachurus picturatus) E	Muscular tissue	Lima	0.1566																		Nifla [318]	2017
Flathead grey mullet (Mugil cephalus) E	Muscular tissue	Lima	0.0328																		Nifla [318]	2017
Mahi-mahi (Coryphaena hippurus) E	Muscular tissue	Lima	0.5356																		Nifla [318]	2017
Eastern Pacific bonito (Sarda chilensis) E	Muscular tissue	Lima	0.0883				0.696			0.006					0.034						Yaulimango and Tarazona [319]	2018
Silver catfish bagre (Rhamdia quelen) E	Muscular tissue	Huancavelica													0						Alminagorta [320]	2018
Rainbow trout (Oncorhynchus mykiss) E	Muscular tissue	Huancavelica	0				0								0.012						Bautista [321]	2018
Black prochilodus (Prochilodus nigricans) E	Muscular tissue	Ucayali													0.05						Vásquez [322]	2018
Bloch's catfish (Pimelodus blochii) E	Muscular tissue	Ucayali													0.05						Vásquez [322]	2018
Silver Mylossoma (Mylossoma duriventre) E	Muscular tissue	Ucayali													0.05						Vásquez [322]	2018
Vulture catfish (Calophysus macropterus) E	Muscular tissue	Madre de Dios	1.128																		Fernández and González [124]	2009
South American silver croaker (Plagioscion squamosissimus) E	Muscular tissue	Madre de Dios	0.0948																		Fernández and González [124]	2009
Carachama (Liposarcus spp.) E	Muscular tissue	Madre de Dios	0.0206																		Fernández and González [124]	2009
Yahuarachi (Potamorhina altamazonica) E	Muscular tissue	Madre de Dios	0.0208																		Fernández and González [124]	2009
Sabretooth tyetra (Hydrolycus pectoralis) E	Muscular tissue	Madre de Dios	0.585																		Fernández and González [124]	2009
Black prochilodus (Prochilodus nigricans) E	Muscular tissue	Madre de Dios	0.0364																		Fernández and González [124]	2009
Red-bellied pacu (Piaractus brachypomus) E	Muscular tissue	Madre de Dios	0																		Fernández and González [124]	2009
Barred catfish (Pseudoplatystoma fasciatum) E	Muscular tissue	Madre de Dios	0.3207																		Fernández and González [124]	2009
Tiger sorubim (Pseudoplatystoma tigrinum) E	Muscular tissue	Madre de Dios	0.183																		Fernández and González [124]	2009
Gilded catfish (Zungaro zungaro) E	Muscular tissue	Madre de Dios	0.6982																		Fernández and González [124]	2009
Canned tuna (Thunnus sp.) E	Muscular tissue	Arequipa	1		24.5		13.5			1.25					0						Ramos [127]	2017
Rainbow trout (Oncorhynchus mykiss) E	Muscular tissue	Puno													0.613						Rojas [316]	2022
Rainbow trout (Oncorhynchus mykiss) E	Muscular tissue	Cajamarca	0				0	15.57		0.003	0.05				0.03						Huancaré [77]	2014
Vulture catfish (Calophysus macropterus) E	Muscular tissue	Madre de Dios		1.505																	Huaypar [323]	2022
Sabretooth tetra (Hydrolycus pectoralis) E	Muscular tissue	Madre de Dios		0.64																	Huaypar [323]	2022
Rainbow trout (Oncorhynchus mykiss) E	Muscular tissue	Puno	0		0	0	0.1	0	0	0	0	0	0	0	0	0.2	0	0.1	0		Acosta [78]	2020
Rainbow trout (Oncorhynchus mykiss) E	Muscular tissue	Junín					0.1215								0.264						Cóndor [324]	2021
Blue shark (Prionace glauca) E	Muscular tissue (male)	Moquegua	0.234																		Nina [325]	2022
Blue shark (Prionace glauca) E	Musclucar tissue (female)	Moquegua	0.33																		Nina [325]	2022
Cabrilla (Paralabrax humeralis) E	Muscular tissue	Ancash								0.63					0.47						Jacinto and Aguilar [326]	2007
Other body parts
Cabrilla (Paralabrax humeralis) E	Guts	Ancash								1.35					0.62						Jacinto and Aguilar [326]	2007
Rainbow trout (Oncorhynchus mykiss) E	Liver	Apurímac								1.52					0						Patiño [119]	2019
Rainbow trout (Oncorhynchus mykiss) E	Liver	Junín													10.49						Chanamé [117]	2009
Rainbow trout (Oncorhynchus mykiss) E	Liver	Puno	0.10665							0.02148					1.0139						Rojas [316]	2022
Black prochilodus (Prochilodus nigricans) E	Liver	Huánuco								2.11					6.34						Rosales [115]	2012
Carachamas (Characidium caucanum) E	Liver	Huánuco								1.91					1.93						Rosales [115]	2012
Royal pleco (Panaque nigrolineatus) E	Liver	Huánuco								1.63					0						Rosales [115]	2012
Rainbow trout (Oncorhynchus mykiss) E	Kidney	Junín													12.54						Chanamé [117]	2009
Silver catfish bagre (Rhamdia quelen) E	Gill	Huancavelica													0						Alminagorta [320]	2018
Rainbow trout (Oncorhynchus mykiss) E	Marrow	Apurímac								0					0.06						Patiño [119]	2019
Rainbow trout (Oncorhynchus mykiss) E	Scale	Apurímac								0					2.36						Patiño [119]	2019
Silver catfish bagre (Rhamdia quelen)	Bone	Huancavelica													0.015						Alminagorta [320]	2018
Rainbow trout (Oncorhynchus mykiss) E	Woven bone	Huancavelica	0				0								0						Bautista [321]	2018
Chilean jack mackerel (Trachurus murphyi) E	Brain and liver	Arequipa	10																		Paz [122]	2013
Chilean jack mackerel (Trachurus murphyi) E	Brain and liver	Moquegua	9.5																		Paz [122]	2013
Chilean jack mackerel (Trachurus murphyi) E	Brain and liver	Tacna	8.2																		Paz [122]	2013
Silver catfish bagre (Rhamdia quelen) E	Skin	Huancavelica													0						Alminagorta [320]	2018
Rainbow trout (Oncorhynchus mykiss) E	Liver	Puno													0.9887					Lake Titicaca floating trout farm	Rojas [316]	2022
Rainbow trout (Oncorhynchus mykiss) E	Gill	Cajamarca	0				0	3.42		0	0.009				0.002						Huancaré [77]	2014
Rainbow trout (Oncorhynchus mykiss) E	Liver	Cajamarca	0				0	6.2		0.002	0.016				0.007						Huancaré [77]	2014
Rainbow trout (Oncorhynchus mykiss) E	Liver	Puno	0		0	0	0.1	0	0	0	0	0	0	0	0	1.22	0	0.1	0		Acosta [78]	2020
Rainbow trout (Oncorhynchus mykiss) E	Kidney	Puno	0.029		1	0.039	0.2	0.039	0.009	0.019	0.19	0.024	0.1	0.019	0.019	0.7	0.019	0.1	0.0049		Acosta [78]	2020
Lorna drum (Sciaena deliciosa) E	Liver	Lima								1.62					4.05					In Callao bay	Rodriguez [327]	2022
Sea silverside (Odontesthes regia) E	Liver	Lima								1.59					5.09					In Callao bay	Rodriguez [327]	2022
Flathead grey mullet (Mugil cephalus) E	Liver	Lima								0.73					0.61					In Callao bay	Rodriguez [327]	2022
Bonito (Sarda chilienses) E	Muscular tissue and Skin	La Libertad	0.4																		Mauricio and Pérez [328]	2018
Chub mackerel (Scomber japonicus) E	Muscular tissue and Skin	La Libertad	0.76																	Commercialized in fishing terminal	Mauricio and Pérez [328]	2018
Chilean jack mackerel (Trachurus murphyi) E	Muscular tissue and Skin	La Libertad	0.57																	Commercialized in fishing terminal	Mauricio and Pérez [328]	2018
