# Supplementary material for: Heavy Metal Bioaccumulation in Peruvian Food and Medicinal Products
Source: Foods. 2024 Feb 29;13(5):762. doi: 10.3390/foods13050762 (PMC10931273; doi:10.3390/foods13050762)
Supplement: Supplementary file 1 [file foods-13-00762-s001.zip › Table SI 6b.xlsx]

## Sheet: Sheet1
Table S6. Maximum metal concentrations of each macroinvertebrate- and mollusk-based edible/medicinal product found in Peruvian studies.
E = Edible
M = Medicinal
Black = Below MPLs (WHO)
Red = Above MPLs (WHO)
Blue = Not regulated by WHO
			Concentration (mg/Kg)
Species	Material	Region	Hg	Al	Sb	As	Ba	Be	Cd	Cr	Sn	Ni	Ag	Pb	Se	Tl	Ti	U	Comments	Source	Year
Macroinvertebrates
Changallo shrimp (Cryphiops caementarius) E	Muscular tissue	Arequipa	0	0	0	6.576	3.4	0	0	0	2.14	1.77	0	0	5.89		0			OEFA [90]	2017
Changallo shrimp (Cryphiops caementarius) E	Muscular tissue	Arequipa	0	280	0.3842	2.64	17.55	0	0.1554	1.78	21.6	0.51	0	0		0	10.5			Veliz [132]	2017
Changallo shrimp (Cryphiops caementarius) E	Muscular tissue	Arequipa	0.0617	21.63	0.0473	2.002	2.029	0	0.6899	0	0	0.118	0.0774	0.092	1.891	0.03295	3.197	0		Ortiz [136]	2018
Changallo shrimp (Cryphiops caementarius) E	Exoskeleton	Arequipa	0	150	0.1718	1.87	79.83	0	0.0148	0.2984	0.974	0.25	0	0		0	4.87			Veliz [132]	2017
Cangrejo violáceo (Platyxanthus orbignyi) E	Quelas	Ancash												11.052						Domínguez and Pereda [133]	2020
Hairy Crab (Cancer setosus) E	Quelas	Ancash												12.365						Domínguez and Pereda [133]	2020
Hairy Crab (Cancer setosus) E	Hepatopancreas	Ancash												3.441						Domínguez and Pereda [133]	2020
Cangrejo violáceo (Platyxanthus orbignyi) E	Hepatopancreas	Ancash												3.441						Domínguez and Pereda [133]	2020
Phylum mix, 25 families (Arthropoda, Mollusca, and Annelida) E	Whole body	Ancash	0			0.046			0.0024	0.017	0.006	0.0439		0.0986						Gallozo and Yauri [329]	2017
Cancer crab (Romaleon polyodon) E	Muscular tissue	Ica				37.29			0.38			0.22		0.09						Miglio [131]	2020
Chilean crab (Hepatus chilensis) E	Muscular tissue	Ica				75.73			3.26			0.46		0.16						Miglio [131]	2020
Mollusks
Chilean abalone (Concholepas concholepas) E	Muscular tissue	Tacna	0						0.12					0						Condori [330]	2020
Keyhole limpet (Fissurella latimarginat) E	Muscular tissue	Tacna	0						0.34					0						Condori [330]	2020
Black snail (Thais chocolata) E	Muscular tissue	Tacna	0						1.02					0						Condori [330]	2020
Magellan mussel (Aulacomya ater) E	Muscular tissue	Lima							2.1					0.48						Barriga and Aranda [134]	2013
Magellan mussel (Aulacomya ater) E	Muscular tissue	Arequipa	0.03						2.7					0.18						Barriga and Aranda [134]	2013
Magellan mussel (Aulacomya ater) E	Muscular tissue	Ica	0.04						1.52					0.12						Barriga and Aranda [134]	2013
Chilean scallop (Argopecten purpuratus) E	Muscular tissue	Piura	0.022						0.2					0.12						Barriga and Aranda [134]	2013
Chilean scallop (Argopecten purpuratus) E	Muscular tissue	Ancash	0.028						0.25					0.14						Barriga and Aranda [134]	2013
Chilean scallop (Argopecten purpuratus) E	Muscular tissue	Ica	0.03						0.32					0.12						Barriga and Aranda [134]	2013
Clam (Donax sp.) E	Muscular tissue	Piura	0.04						0.21					0.2						Barriga and Aranda [134]	2013
Clam (Donax sp.) E	Muscular tissue	Ica							0.23					0.33						Barriga and Aranda [134]	2013
Pacific clam (Gari solida) E	Muscular tissue	Piura	0.043						0.59					0.14						Barriga and Aranda [134]	2013
Pacific clam (Gari solida) E	Muscular tissue	Ica	0.04						0.2					0.11						Barriga and Aranda [134]	2013
Chilean scallop (Argopecten purpuratus) E	Muscular tissue	Piura	0						0.232					0						Rebaza [135]	2016
Navajuela (Tagelus dombeii) E	Muscular tissue	Piura	0						0.1					0						Rebaza [135]	2016
Clam (Donax sp.) E	Muscular tissue	Piura	0						0.12					0						Rebaza [135]	2016
Magellan mussel (Aulacomya atra) E	Muscular tissue	Moquegua	0.01						1.26					0						Mamani [331]	2019
Magellan mussel (Aulacomya atra) E	Muscular tissue	Moquegua							0.79										Long-line depurating type treatment system	Mamani [331]	2019
Magellan mussel (Aulacomya atra) E	Muscular tissue	Ica							1.1	0.5				3.02						Surco et al. [332]	2021
Chilean scallop (Argopecten purpuratus) E	Muscular tissue	Ica				0.52			0.22			0.02		0.02						Miglio [131]	2020
Chocolate rock shell (Thaisella chocolata) E	Muscular tissue	Ica				71.75			1.54			0.15		0.11						Miglio [131]	2020
Chilean scallop (Argopecten purpuratus) E	Muscular tissue	Ica				0.58			0.32			0.05		0.02						Miglio [131]	2020
Lapa (Fissurella sp.) E	Muscular tissue	Ancash							1.02					0.56						Jacinto and Aguilar [326]	2007
Caracol (Stramonita T. chocolata) E	Muscular tissue	Ancash							1.18					0.19						Jacinto and Aguilar [326]	2007
Chitón (Chiton spp., indeterminado) E	Muscular tissue	Ancash							1.46					0.61						Jacinto and Aguilar [326]	2007
Chorito (Semimytilus algosus) E	Muscular tissue	Ancash							1.69					1.51						Jacinto and Aguilar [326]	2007
Chilean abalone (Concholepas concholepas) E	Gutted body	Moquegua	0.11			33.53			2.11					0.5						Cárdenas [333]	2017
Black snail (Thais chocolata) E	Gutted body	Moquegua	0.07			34.25			1.04					0.5						Cárdenas [333]	2017
Keyhole limpet (Fissurella latimarginat) E	Gutted body	Moquegua	0			8.7			0.99					0.5						Cárdenas [333]	2017
Chilean abalone (Concholepas concholepas) E	Gutted body	Tacna							0.55					0.04						Cárdenas et al. [334]	2015
Chilean abalone (Concholepas concholepas) E	Gutted body	Moquegua							1.3					0.03						Cárdenas et al. [334]	2015
Limpet (Fissurella sp.) E	Gutted body	Tacna							1.21					0						Cárdenas et al. [334]	2015
Limpet (Fissurella sp.) E	Gutted body	Moquegua							1.49					0.06						Cárdenas et al. [334]	2015
Black snail (Thais chocolata) E	Gutted body	Tacna							0.31					0						Cárdenas et al. [334]	2015
Black snail (Thais chocolata) E	Gutted body	Moquegua							1.57					0.3						Cárdenas et al. [334]	2015
Ribbed mussel (Aulacomya atra) E	Gutted body	Tacna							0.7					0.03						Cárdenas et al. [334]	2015
Ribbed mussel (Aulacomya atra) E	Gutted body	Moquegua							2.23					0.07						Cárdenas et al. [334]	2015
Ribbed mussel (Aulacomya atra) E	Whole body	Tacna							1.17					0.08						Cárdenas et al. [334]	2015
Ribbed mussel (Aulacomya atra) E	Whole body	Moquegua							2.23					14						Cárdenas et al. [334]	2015
Chilean scallop (Argopecten purpuratus) E	Digestive gland	Ica				3.42			23.33			0.6		0.24					In Paracas bay, at authorized zones	Miglio [131]	2020
Chilean scallop (Argopecten purpuratus) E	Intestine	Ica				1.79			1.22			0.39		0.78						Miglio [131]	2020
Chilean scallop (Argopecten purpuratus) E	Gonad	Ica				0.97			0.32			0.05		0.05						Miglio [131]	2020
Chilean scallop (Argopecten purpuratus) E	Gill	Ica				1.03			0.59			0.09		0.12						Miglio [131]	2020
Lapa (Fissurella sp.) E	Guts	Ancash							1.43					0.74						Jacinto and Aguilar [326]	2007
Caracol (Stramonita chocolata) E	Guts	Ancash							1.5					0.94						Jacinto and Aguilar [326]	2007
Chitón (Chiton spp.) E	Guts	Ancash							1.47					1.4						Jacinto and Aguilar [326]	2007
Chorito (Semimytilus algosus) E	Guts	Ancash							1.69					1.51						Jacinto and Aguilar [326]	2007
Magellan mussel (Aulacomya atra) E	Muscular tissue	Tacna	0			1.63			1.61					0						Sánchez [335]	2022
Choro mussel (Choromytilus chorus) E	Muscular tissue	Tacna	0			1.47			1.23					0						Sánchez [335]	2022
