# Supplementary material for: Heavy Metal Bioaccumulation in Peruvian Food and Medicinal Products
Source: Foods. 2024 Feb 29;13(5):762. doi: 10.3390/foods13050762 (PMC10931273; doi:10.3390/foods13050762)
Supplement: Supplementary file 1 [file foods-13-00762-s001.zip › Table SI 7b.xlsx]

## Sheet: Sheet1
Table S7. Maximum metal concentrations of each mammal-based edible/medicinal product found in Peruvian studies.
E = Edible
M = Medicinal
Black = Below MPLs (WHO)
Red = Above MPLs (WHO)
Blue = Not regulated by WHO
			Concentration (mg/Kg)
Species	Material	Region	Hg	Al	Sb	As	Ba	Be	Cd	Cr	Sn	Ni	Ag	Pb	Se	Tl	Ti	U	Comments	Source	Year
Body parts
Alpaca (Vicugna pacos) E	Muscular tissue	Huancavelica							0.346					0.0021						Pérez [336]	2019
Alpaca (Vicugna pacos) E	Muscular tissue	Puno	0			0			0.20721					0					With mining activity	Iquise [337]	2017
Alpaca (Vicugna pacos) E	Muscular tissue	Puno	0.058333			0			0.11987					0					Without mining activity	Iquise [337]	2017
Alpaca (Vicugna pacos) E	Muscular tissue	Puno	0.08734			0			0.16354					0						Huanqui [297]	2018
Alpaca (Vicugna pacos) E	Liver	Puno	0.112352			0			0.015877					0					With mining activity	Iquise [337]	2017
Alpaca (Vicugna pacos) E	Liver	Puno	0.116663			0			0					0					Without mining activity	Iquise [337]	2017
Alpaca (Vicugna pacos) E	Liver	Puno	0.11451			0			0.01588					0						Huanqui [297]	2018
Alpaca (Vicugna pacos) E	Lung	Puno	0.124597			0			0.13454					0					With mining activity	Iquise [337]	2017
Alpaca (Vicugna pacos) E	Lung	Puno	0			0			0					0					Without mining activity	Iquise [337]	2017
Alpaca (Vicugna pacos) E	Lung	Puno	0.09041			0			0.10539					0						Huanqui [297]	2018
Alpaca (Vicugna pacos) E	Kidney	Puno	0.135256			0			0					0					With mining activity	Iquise [337]	2017
Alpaca (Vicugna pacos) E	Kidney	Puno	0.066544			0			0.03202					0					Without mining activity	Iquise [337]	2017
Alpaca (Vicugna pacos) E	Kidney	Puno	0.1009			0			0.03202					0						Huanqui [297]	2018
Alpaca (Vicugna pacos) E	Bone	Puno	0.17498			0			0.40854					0					With mining activity	Iquise [337]	2017
Alpaca (Vicugna pacos) E	Bone	Puno	0.17983			0			0.39297					0					Without mining activity	Iquise [337]	2017
Alpaca (Vicugna pacos) E	Bone	Puno	0.13573			0			0.27165					0						Huanqui [297]	2018
Alpaca (Vicugna pacos) E	Fiber	Puno	0.22666			0.05928			0.05919					0.0077						Huanqui [297]	2018
Processed
Cow (Bos taurus) E	Milk	Arequipa				0.017			0.014					0.033						Fernández and Ramos [338]	2020
Cow (Bos taurus) E	Milk	Junín												0.022					El Mantaro Experimental Station	Quijada [296]	2021
Cow (Bos taurus) E	Milk	Puno	0.0026						0.00121					0.0199						Velarde [339]	2021
Cow (Bos taurus) E	Milk	Puno	0.0022						0.0012					0.0256						Pacco [340]	2018
Cow (Bos taurus) E	Milk	Moquegua				0.0916								0.2867						Condori [6]	2020
Cow (Bos taurus) E	Milk	Puno												12.76						Barcena [153]	2011
Cow (Bos taurus) E	Milk	Cajamarca				0.027			0.177					0.119						Sáenz [341]	2019
Cow (Bos taurus) E	Milk	Junín												0						Carrillo [298]	2013
Cow (Bos taurus) E	Milk	Puno	0.0035			0.57			0.0074					0.27						Chata [342]	2015
Cow (Bos taurus) E	Milk	Lima	0.0094242											0.356216						Obregón and Zambrano [343]	2017
Cow (Bos taurus) E	Milk	Junín							0.69					0.022					El Mantaro Experimental Station	Mamani [344]	2021
Cow (Bos taurus) E	Milk	Junín							0.023										Dry season	Gómez [246]	2021
Cow (Bos taurus) E	Milk	Junín							0.028										Wet season	Gómez [246]	2021
Cow (Bos taurus) E	Milk	Junín							0.69											Huacho [247]	2022
Cow (Bos taurus) E	Milk	Puno	1.278						1.833					11.611						Paredes [147]	2019
Cow (Bos taurus) E	Milk	Pasco	0.00270667			0.0437			0.0009					0.108						Bernal [345]	2019
Cow (Bos taurus) E	Cheese	Ancash							0.085					0.789					Andean cheese	Bracamonte and Bulnes [346]	2019
Cow (Bos taurus) E	Cheese	Lima							0.0046					0.0244						Espinoza [347]	2022
