# Supplementary material for: Heavy Metal Bioaccumulation in Peruvian Food and Medicinal Products
Source: Foods. 2024 Feb 29;13(5):762. doi: 10.3390/foods13050762 (PMC10931273; doi:10.3390/foods13050762)
Supplement: Supplementary file 1 [file foods-13-00762-s001.zip › Table SI 8b.xlsx]

## Sheet: Sheet1
Table S8. Maximum metal concentrations of each other types of edible/medicinal product found in Peruvian studies.
E = Edible
M = Medicinal
Black = Below MPLs (WHO)
Red = Above MPLs (WHO)
Blue = Not regulated by WHO
			Concentration (mg/Kg)
Species	Material	Region	Hg	Al	Sb	As	Ba	Be	Cd	Cr	Sn	Ni	Ag	Pb	Se	Tl	Ti	U	Comments	Source	Year
Bees, pollen, propolis, honey
Bee (Antophila sp.) E	Honey	Junín												0.042						Párraga and Winniber [155]	2017
Bee (Antophila sp.) M	Pollen	Junín												0.675						Párraga and Winniber [155]	2017
Bee (Antophila sp.) M	Propolis	Junín												4.342						Párraga and Winniber [155]	2017
Bee (Antophila sp.) E	Honey	Apurímac												0.0013						Merino and Pillaca [348]	2019
Bee (Antophila sp.) E	Honey	Junín												0						Huamán [256]	2014
Eggs
Chicken (Gallus domesticus) E	Egg (white)	Lima	0																	Delgado [157]	2021
Chicken (Gallus domesticus) E	Egg (yolke)	Lima	0.14																	Delgado [157]	2021
Chicken (Gallus domesticus) E	Egg (whole)	Lima	0.06																	Delgado [157]	2021
Chicken (Gallus domesticus) E	Egg (white)	La Libertad							0											Ríos [158]	2019
Chicken (Gallus domesticus) E	Egg (yolke)	La Libertad							0											Ríos [158]	2019
Japanese quail (Coturnix japonica) E	Egg (yolke)	Lima	0.012			0.041			0.136					2.873						Santisteban [159]	2021
Japanese quail (Coturnix japonica) E	Egg (white)	Lima	0.014			0.021			0.158					4.094						Santisteban [159]	2021
Japanese quail (Coturnix japonica) E	Egg (whole)	Lima	0.024			0.039			0.02					2.727						Santisteban [159]	2021
Chicken (Gallus domesticus) E	Egg (white)	Lima	0.5212						0.0029					0.6211						Gonzáles [160]	2015
Chicken (Gallus domesticus) E	Egg (yolke)	Lima	0.3458						0.0022					0.6119						Gonzáles [160]	2015
Chicken (Gallus domesticus) E	Egg (whole)	Lima	0.4528						0.0108					0.6208						Gonzáles [160]	2015
Lichen and fungi
Lichen (Usnea sp.) M	Lichen	Ancash		92.72		4.8				20.12		0.82		1.618					White cordillera with natural pollution and some anthropic influence	Arroyo [349]	2022
Fungi (Sticta weigelii) M	Lichen	Ancash		42.64		0.47				7.67		1.77		4.22					White cordillera with natural pollution and some anthropic influence	Arroyo [349]	2022
Lichen/fungi (Canoparmelia sp.) M	Lichen	Tacna							0.31	6.49		3.68		13.86						Salinas [350]	2021
Lichen/fungi (Canoparmelia sp.) M	Lichen	Tacna							0.52	4.39		2.92		15.75						Salinas [350]	2021
Lichen (Dirinaria applanata) M	Lichen	Tacna							0.22	9.56		4.94		17.63						Salinas [350]	2021
Lichen (Dirinaria applanata) M	Lichen	Tacna							0.31	2.04		2.07		13.29						Salinas [350]	2021
Lichen (Flavopunctelia flaventior) M	Lichen	Tacna							0.53	2.95		2.62		19.07						Salinas [350]	2021
Lichen (Flavopunctelia sp.) M	Lichen	Tacna							0.82	2.67		2.09		7.12						Salinas [350]	2021
Lichen (Parmotrema reticulatum) E	Lichen	Tacna							0.27	2.19		2.06		12.33						Salinas [350]	2021
Lichen (Parmotrema sp.) E	Lichen	Tacna							0.42	2.44		2.18		7.49						Salinas [350]	2021
Lichen/fungi (Phaeophyscia sp.) M	Lichen	Tacna							0.37	6.54		3.48		11.18						Salinas [350]	2021
Algae
Seaweed (Chondracanthus chamissoi) E	Thallus	La Libertad							0.4					0						Guerrero [351]	2019
Seaweed (Chondracanthus chamissoi) E	Thallus	La Libertad							1.27					7.16						Rodríguez [352]	2010
Red algae (Gracilariopsis lemaneiformis) E	Thallus	La Libertad							0.5					0						Lozano [353]	2019
Giant grey weed (Lessonia nigrescens) E	Biomass	Moquegua				0.017			0.034			0.163		0.019						Salazar [354]	2022
Red alge (Gracilariopsis lemaneiformis) E	Biomass	Lima							0.33						0.08					Silva and Flores [355]	2022
Others
Frog (Batrachophrynus macrostomus) E	Muscular tissue	junin	0.0103			0.0731			0.0118					0.0203						Castillo [356]	2008
